# 1 **DciA helicase operators exhibit diversity across bacterial phyla**

2 Helen C. Blaine<sup>1\*</sup>, Joseph T. Burke<sup>2\*</sup>, Janani Ravi<sup>2#</sup>, and Christina L. Stallings<sup>1#</sup>

3 <sup>1</sup>Department of Molecular Microbiology, Washington University School of Medicine, Saint Louis,  
4 Missouri 63110, USA.

5 <sup>2</sup>Departments of Pathobiology and Diagnostic Investigation, Microbiology and Molecular  
6 Genetics, Michigan State University, East Lansing, Michigan 48824, USA.

7 \*Contributed equally.

8 #Correspondence to [stallings@wustl.edu](mailto:stallings@wustl.edu) and [janani@msu.edu](mailto:janani@msu.edu).

9

## 10 **ABSTRACT**

11 A fundamental requirement for life is replication of an organism's DNA. Studies in *Escherichia coli*  
12 and *Bacillus subtilis* have set the paradigm for how DNA replication occurs in bacteria. During  
13 replication initiation in *E. coli* and *B. subtilis*, the replicative helicase is loaded onto the DNA at the  
14 origin of replication by an ATPase helicase loader. However, most bacteria do not encode  
15 homologs to the helicase loaders in *E. coli* and *B. subtilis*, raising the question of how helicase  
16 activity is facilitated in other bacteria during DNA replication initiation. Recent work has identified  
17 the DciA protein as a predicted helicase operator that may perform a function analogous to the  
18 helicase loaders in *E. coli* and *B. subtilis*. DciA proteins are defined by the presence of a DUF721  
19 domain and are conserved in most bacteria. However, we find that the sequence conservation  
20 between DciA proteins across different phyla is very low. Therefore, to comprehensively define  
21 the DciA protein family, we took a computational evolutionary approach. These analyses identified  
22 diversity in sequence features and domain architectures amongst DciA homologs that were  
23 associated with specific phylogenetic lineages. The diversity of DciA proteins elucidated here  
24 represents the evolution of helicase operation in bacterial DNA replication, highlights the need for

25 phyla-specific analyses of this fundamental biological process, and is an important example of  
26 how research in bacterial DNA replication is necessary in organisms beyond *E. coli* and *B. subtilis*.

27

## 28 **IMPORTANCE**

29 Despite the fundamental importance of DNA replication for life, this process remains understudied  
30 in bacteria outside of *Escherichia coli* and *Bacillus subtilis*. In particular, most bacteria do not  
31 encode the helicase loading proteins that are essential in *E. coli* and *B. subtilis* for DNA replication.  
32 Instead, most bacteria encode a DciA homolog that likely constitutes the predominant mechanism  
33 of helicase operation in bacteria. However, it is still unknown how DciA structure and function  
34 compares across diverse phyla that encode DciA proteins. In this study, we perform a  
35 computational evolutionary analysis that uncovers tremendous diversity amongst DciA homologs.  
36 These studies provide a significant advance in our understanding regarding an essential  
37 component of the bacterial DNA replication machinery.

38

39

## 40 INTRODUCTION

41 DNA replication is a process critical to life for all organisms. The current paradigm for the process  
42 of DNA replication in bacteria has primarily been based on studies in *Escherichia coli* and *Bacillus*  
43 *subtilis*. Bacterial DNA replication begins with the binding of the replication initiation protein DnaA  
44 to specific sequences referred to as DnaA boxes at the origin of replication (*oriC*) (1–7). DnaA  
45 binding to double-stranded DNA (dsDNA) triggers DNA unwinding at an AT-rich region of DNA  
46 called the DNA unwinding element (DUE), leaving a bubble of single-stranded DNA (ssDNA) (2,  
47 3, 6, 8, 9). The ssDNA bubble is coated by single-stranded binding protein (SSB) (10), followed  
48 by the concerted loading of two hexameric replicative helicases onto the SSB-coated replication  
49 fork. The two helicases translocate along the two sides of the replication fork, unwinding the  
50 dsDNA as they move (1, 3, 6, 11–14).

51 Bacterial replicative helicases (DnaB in *E. coli* and DnaC in *B. subtilis*) are Superfamily IV  
52 type helicases, which are defined as hexameric RecA ATPases (3, 15, 16) that translocate in the  
53 5'-3' direction (11, 12, 17). The bacterial replicative helicase translocates on ssDNA using a  
54 “hand-over-hand” mechanism, which is driven by nucleotide hydrolysis (18, 19) (reviewed in  
55 (17)). The C-terminus of the bacterial replicative helicase contains the RecA-like fold that is  
56 responsible for the ATPase activity, and is connected to an N-terminal scaffolding domain via a  
57 linker region (6, 20, 21). The replicative helicase must oligomerize into a double-layered  
58 hexameric ring to be active during replication, with one layer made up of the N-termini and the  
59 other layer comprised of the C-termini (6, 22, 23). In *E. coli* and *B. subtilis*, the loading of the  
60 replicative helicase is performed with the help of a helicase loader, termed DnaC in *E. coli* and  
61 DnaI in *B. subtilis* (3, 24–27). *dnaC* and *dnaI* were acquired by *E. coli* and *B. subtilis*, respectively,  
62 via domestication of related but distinct phage ATPase-containing genes (28). DnaC and DnaI  
63 are both in the ATPases Associated with diverse cellular Activities (AAA+) ATPase family, and

64 the ATPase activity of DnaC is required for its helicase loading function at the origin of replication  
65 (29, 30).

66 *E. coli* and *B. subtilis* have long represented the paradigm of helicase loading during  
67 bacterial replication. However, the majority of bacteria do not encode ATPase helicase loader  
68 homologs to DnaC or DnaI. Instead, most bacteria encode the ancestral protein, DciA (DnaC/I  
69 Antecedent) (28, 31), which is defined by the presence of a Domain of Unknown Function (DUF)  
70 721. Despite the prevalence of DUF721-containing DciA homologs in bacteria (28), DciA has only  
71 been studied in actinobacterial (*Mycobacterium tuberculosis* and *Mycobacterium smegmatis*) and  
72 gammaproteobacterial (*Pseudomonas aeruginosa* and *Vibrio cholerae*) species (28, 31–33). DciA  
73 homologs interact with the replicative helicase DnaB and are essential for *M. tuberculosis*, *M.*  
74 *smegmatis*, and *P. aeruginosa* DNA replication and viability (28, 31). Based on DciA's interaction  
75 with the replicative helicase and requirement for DNA replication, DciA has been proposed to  
76 perform a function analogous to that of the DnaC/I helicase loaders. However, DciA does not  
77 have a predicted ATPase domain and, therefore, cannot be considered a helicase loader like  
78 DnaC/I. Instead, DciA is referred to as a predicted helicase operator, although the mechanism of  
79 DciA helicase operation is still unknown (28, 31).

80 Beyond the presence of the DUF721, DciA domain architecture and the relationship  
81 between DciA homologs across diverse bacterial phyla are yet to be investigated. To address  
82 these open questions, we took a computational evolutionary approach and analyzed the  
83 phylogenetic distribution, domain architecture, and sequence conservation for DciA homologs. We  
84 have discovered low sequence similarity between DciA homologs from different phyla, lineage-  
85 specific domain architectures, and divergent evolution of specific DciA homologs, all of which  
86 likely have functional consequences. This study provides an evolutionary picture of DciA, reveals  
87 key differences between homologs, and generates the framework for mechanistic investigation  
88 into different classes of DciA proteins.

## 89 RESULTS

### 90 DciA proteins vary considerably in sequence across bacterial phyla

91 Most bacteria encode a DciA homolog, defined by the presence of the DUF721 domain (28).  
92 Based on studies in *M. tuberculosis*, the DUF721 is predicted to contain a region of structural  
93 homology to the N-terminus of DnaA, which was thus named the DnaA N-terminal-like (DANL)  
94 domain (31). The presence of the DANL domain has subsequently been confirmed in *V. cholerae*  
95 DciA (32). Our analysis of other DciA homologs indicates that this predicted structural domain is  
96 conserved, suggesting that it is important for DciA function. However, beyond the annotation of  
97 the DUF721 (henceforth referred to as the DciA domain), it is unclear how different DciA homologs  
98 relate to each other. A protein BLAST search for *M. tuberculosis* DciA homologs based on primary  
99 amino acid sequence only identifies closely related homologs, all of which are in actinobacteria  
100 (**Figure S1**). We found a similar pattern when retrieving homologs with *Pseudomonas aeruginosa*,  
101 all homologs are proteobacterial (**Figure S1**). This suggests that the DciA homologs in different  
102 phyla are diverse with low conservation in their primary amino acid sequence. We, therefore,  
103 needed a more extensive method to investigate the relationship between DciA homologs across  
104 different phyla. To achieve this, we used the MolEvolvR web application to comprehensively  
105 identify and characterize DciA homologs across all bacterial lineages using molecular evolution  
106 and phylogeny (34). Since individual DciA proteins from specific lineages were not successful in  
107 retrieving homologs from other distant phyla, we selected a much wider range of starting points.  
108 We started with 21 DciA proteins from 11 diverse phyla (28), including representatives from  
109 actinobacteria, proteobacteria, and cyanobacteria (**Table S1; Figure 1A**), as query sequences to  
110 identify diverse DciA homologs across additional bacterial phyla (**Figure 1A**). Our homology  
111 search resulted in identifying ~9K DciA homologs from 15 bacterial phyla (**Figure 1B**). In line with

112 both genome sequencing and publication bias, proteobacteria and actinobacteria were over-  
113 represented in both our queries and recovered sequences (35–37) (**Figure 1A,B**).

114 No single DciA protein identified homologs in all other phyla (**Figure 1C**), supporting that  
115 there is low sequence conservation between DciA homologs. To quantify the sequence  
116 conservation across phyla, we analyzed the pairwise similarity for the 21 DciA protein homologs  
117 used as our query set (**Figure 2**). We found a wide range of similarities (~20–60%), with the  
118 majority of homologs showing 30-40% similarity. Our query sequence dataset contained multiple  
119 species within each class of proteobacteria, so we were able to compare the conservation  
120 between DciA homologs within proteobacteria as well as between proteobacteria and other phyla.  
121 Similarity was high between DciA proteins within alphaproteobacteria (62.3% between *Brucella*  
122 *abortus* and *Mesorhizobium australicum*) and gammaproteobacteria (52.3% between *Proteus*  
123 *mirabilis* and *Vibrio cholerae*). Overall, DciA protein queries within proteobacteria have an  
124 average of ~30% similarity, and proteobacterial homologs have an average of 31.12% similarity  
125 to homologs outside of their phyla (**Figure 2**). Actinobacterial and proteobacterial DciA homologs  
126 share between 21–34% sequence similarity. For example, the *M. tuberculosis* DciA protein shares  
127 28.3% identity with the *Pseudomonas aeruginosa* DciA (**Figure 2**). DciA shares this trait of low  
128 sequence conservation across phyla with its interaction partner, the replicative helicase DnaB,  
129 where DnaB proteins in *M. tuberculosis* and *P. aeruginosa* only share 20.4% similarity. Bacterial  
130 replication proteins in general have low to moderate sequence conservation across phyla (11–  
131 49% similarity across replisome proteins between *E. coli* and *B. subtilis*) (38). Therefore, our data  
132 showing low DciA sequence conservation is consistent with other replication initiation proteins.  
133 Given the low-level conservation across divergent DciA proteins, it was unsurprising that  
134 individual DciA query proteins never returned homologs from all other phyla and emphasizes the  
135 need for multiple starting points for analysis (**Figure 1C**).

136           While we identified a diverse set of DciA homologs, including those with moderate to low  
137 sequence conservation from most lineages (**Figure 1**), we were still missing multiple phyla  
138 previously reported to contain DciA homologs. Therefore, we expanded our search further by  
139 including 66 DciA query proteins from 20 bacterial phyla as query sequences (**Figure 3A; Table**  
140 **1**). This hugely diversified our results identifying >13K unique DciA homologs from 22 bacterial  
141 phyla (**Figure 3B,C**). Consistent with the previous smaller set of DciA query proteins (**Figure 1**),  
142 we found that most DciA proteins identified homologs within their corresponding phylum as well  
143 as ones within actinobacteria and proteobacteria (**Figure 3C**). However, a few DciA proteins  
144 recovered homologs only within their own phylum. Specifically, most actinobacterial (10/12) and  
145 a few proteobacterial (10/30) DciA proteins only recovered homologs within their respective  
146 phylum (**Figure 1C, 3C**). In addition, the DciA proteins from nitrospirae, gemmatimonadetes,  
147 fibrobacteres, chlorobi, chlamydiae, and bacteroidetes identified homologs from actinobacteria  
148 and not proteobacteria, suggesting that these DciA proteins are closer evolutionarily to  
149 actinobacterial DciA homologs than proteobacterial DciA. In contrast, acidobacteria,  
150 cyanobacteria, and thermodesulfobacteria recovered homologs from proteobacteria and not  
151 actinobacteria. The evolution of DciA seems to mirror the phylogenetic distance of these species;  
152 gemmatimonadetes, chlamydiae, and bacteroidetes are more closely evolutionary related to  
153 actinobacteria than proteobacteria based on the 16S rRNA gene (28, 39). Together these data  
154 suggest that the DciA homologs in actinobacteria and proteobacteria likely represent the most  
155 evolutionarily divergent repertoire of DciA homologs. This analysis also indicates that DciA  
156 proteins from distinct phyla carry lineage-specific signatures, likely co-evolving with other phylum-  
157 specific protein families involved in DNA replication.

158

159 **DciA domain architecture varies in a lineage-specific manner**

160 The evolutionary divergence in DciA proteins prompted us to take a closer look at the sequence-  
161 structure features of these homologs, including sequence alignment and domain architectures.  
162 As a first step, we aligned the 66 DciA starting point protein sequences from 20 phyla (**Figure 3**;  
163 **Table 1**) using the MolEvolvR web application (34) and examined their domain architectures  
164 (**Figure 4**; *see Methods*). Tracing the phylogenetic tree of DciA sequences confirms that the  
165 evolution of DciA proteins roughly corresponds to bacterial phylogeny, where DciA homologs tend  
166 to cluster with their own phyla (*e.g.*, proteobacteria and actinobacteria) (**Figure 4 center**). Only  
167 DciA homologs that encoded the signature DUF721 domain were included in our alignment, and  
168 could be classified into one of four distinct groups based on where the DUF721 domain occurs  
169 within the protein (**Figures 4, 5, and S2**). We describe the group memberships and descriptions  
170 of our 66 DciA query proteins in the following sections (**Table 1**).

171 In Group 1 DciA proteins, the DUF721 spans at least 70% of the protein sequence, with  
172  $\leq 25$  amino acids on either side of the DUF721 (**Figures 4, 5A, S2; Table 1**, See Group 1 example:  
173 *R. rickettsii* DciA). Group 1 DciA proteins are present in acidobacteria, bacteroidetes, chlamydiae,  
174 chlorobi, gemmatimonadetes, elusimicrobia, fibrobacteres, fusobacteria, thermotogae,  
175 planctomycetes, spirochaetes, and proteobacteria (**Table 1**). The DUF721 domain spanning the  
176 entire protein in this group suggests that the DUF721 is likely sufficient for DciA function in these  
177 bacteria.

178 Group 2 DciA homologs have  $\leq 25$  amino acids C-terminal to the DUF721 and an N-  
179 terminal extension of  $> 25$  amino acids and no known domains (**Figures 4, 5A, S2; Table 1**, See  
180 Group 2 example: *M. tuberculosis* DciA). Group 2 DciA homologs are present in actinobacteria  
181 and verrucomicrobia (**Figure 5A; Table 1**). Group 2 DciA queries in the mycobacteriales order  
182 are predicted to have intrinsically disordered regions by MobiDBLite software (also noted in (40))  
183 in the N-terminal extension (**Figure 4, left**). This predicted intrinsically disordered region is not



184 present in bifidobacteriales, another order within actinobacteria, or in other Group 2 proteins.  
185 Expression of the *M. tuberculosis* DciA DUF721 alone is not sufficient to support viability in  
186 mycobacteria (31), suggesting that the N-terminal extension is essential for DciA function in  
187 mycobacteria, although its function remains unknown. The requirement for the sequence N-  
188 terminal to the DUF721 in mycobacteria and the absence of this N-terminal sequence in Group 1  
189 and 3 DciA proteins demonstrates divergent evolution of DciA homologs in bacteria and the  
190 potential for functional variation. In addition to the N-terminal extension in all Group 2 DciA  
191 homologs, 4 actinobacterial proteins also encode a short predicted region of disorder C-terminal  
192 to the DUF721 (19aa in *M. tuberculosis*; **Figure 4, left, Table 1**).

193 Group 3 DciA homologs have  $\leq 25$  amino acids N-terminal to the DUF721 and a C-terminal  
194 extension  $>25$  amino acids long (**Figures 4, 5A, S2; Table 1**, See Group 3 example: *V. cholerae*  
195 DciA). Group 3 DciA homologs are present in acidobacteria, spirochaetes, deferribacteres,  
196 cyanobacteria, dictyoglomi, nitrospirae, thermodesulfobacteria, and proteobacteria. The DciA  
197 homologs in *T. palladium*, *Nitrospirae moscoviensis*, and *V. parahemolyticus* are the only Group  
198 3 proteins that are predicted to be intrinsically disordered in the region C-terminal to the DUF721  
199 domain using the MobiDBLite predictor (**Figure 4, left; Table 1**). However, the C-terminal  
200 sequence of *V. cholerae* DciA was predicted to be intrinsically disordered in prior studies using  
201 PONDR and IUPred2A software, which was further confirmed by small-angle X-ray scattering  
202 (32). When we analyzed the *V. cholerae* sequence using the JRONN disorder prediction track,  
203 we were able to identify an intrinsically disordered region C-terminal to the DUF721 (**Figure 4**).  
204 Therefore, it is possible that other Group 3 proteins could have intrinsically disordered domains  
205 that are not predicted by the tools we are using. The C-terminal intrinsically disordered sequence  
206 of *V. cholerae* DciA is required for its interaction with DnaB as well as for the enhancement of the  
207 association between *V. cholerae* DnaB and ssDNA *in vitro* (32). The absence of the C-terminal  
208 extension in Groups 1 and 2 DciA proteins further supports evolutionary divergence in DciA

209 protein sequence and structure, which likely impacts specialized lineage-specific protein function  
210 or mechanism of interaction with the replicative helicase. The one actinobacterial DciA protein  
211 from our query set that falls into Group 3 is encoded by *S. seoulensis*. This protein encodes a  
212 YspA domain (Pfam: YAcAr/PF10686) C-terminal to the DUF721 (**Figure 4, 5A, S2; Table 1**).  
213 YspA domains within proteins typically have fusions to domains that process nucleotide-derived  
214 ligands such as ADP-ribose and may function as sensors of these ligands and nucleic acids (41).

215 In Group 4 DciA proteins, the DUF721 domain falls > 25 amino acids away from both  
216 termini (**Figure 4, 5A, S2; Table 1**, See Group 4 example: *C. mirabilis* DciA). In our query set,  
217 Group 4 consists of DciA proteins in proteobacteria, actinobacteria, and synergistetes. The Group  
218 4 DciA homologs in *F. fastidiosum*, *S. coelicor*, and *S. avermitilis* have regions of disorder both  
219 N-terminal and C-terminal to the DUF721 (**Figure 4, left**).

220 Analysis of how the DciA groups are distributed in different bacterial phyla for our starting  
221 set of DciA homologs (**Figure 4**) reveals that 75% of homologs we queried from actinobacteria  
222 fall into Group 2, and 66% of proteobacterial DciA proteins from our starting set fall into Group 3.  
223 (**Figure 5A; Table 1**). These two phyla had the most representatives in our set of query proteins,  
224 and they form distinct clusters on the phylogenetic tree (**Figure 4, right**). Further examining the  
225 characteristics of each group revealed that 75% of DciA proteins from gram-positive bacteria  
226 included in the query fall into Group 2, and 54% of DciA starting points from gram-negative  
227 bacteria fall into Group 3 (**Figure 5B**). By contrast, no Group 1 DciA proteins are from gram-  
228 positive bacterial queries, and Group 1 makes up 37% of gram-negative bacterial queries (**Figure**  
229 **5B**). In addition to classifying each DciA protein from our query set into one of four groups based  
230 on the position of the DUF721, we found that the alphaproteobacteria DciA proteins in the  
231 Rickettsiales and Hyphomicrobiales orders harbored an insertion within the DUF721 that is not  
232 present in any other phyla (**Figure 4, right; Figure S2**). This could indicate further functional  
233 divergence of the DciA homologs in these orders.

234 Overall, these analyses reveal the diversity of domain architectures amongst our selected  
235 66 DciA homologs. A more comprehensive analysis of all DciA homologs would be required to  
236 fully understand the distribution of diverse domain architectures in different phyla. Nonetheless,  
237 these data demonstrate that DciA homologs have diverged significantly in sequence structure  
238 based on the position and sequence of the DUF721, which may impact their function and  
239 interaction with the DNA replication machinery.

240

### 241 **The DciA domain proximity network**

242 To further investigate the possible functions of each of the ~13K putative DciA homologs that we  
243 have identified using our diverse query set, we interrogated their domain architectures (*see*  
244 *Methods*). A striking majority of these homologs showed no variation, carrying a single DciA  
245 domain (the Pfam DUF721 domain) (**Figure 6**). Less than 1% of the proteins exhibited novel  
246 fusions with the DciA domain. For example, the DciA protein from *S. seoulensis* identified other  
247 YAcAr/PF10686 Pfam members in Streptomyces, as noted above in **Figure 4**. These  
248 actinobacterial homologs carry the YspA/YAcAr-like domain known to be associated with NAD  
249 utilization and ADP-ribosylation domains (41) (**Figure 6**). We find only a few streptomyces DciA  
250 homologs that share this domain architecture (**Figure 4, S3**), suggesting that DciA in this genus  
251 might have evolved this unique function. In addition, some proteobacteria also showed variation  
252 in domains associated with the DUF721 domain: i) Reyranela species carry a C-terminal  
253 thioredoxin domain, with possible redox function, and ii) the pseudomonas genus has a rare  
254 instance of a DciA dyad (two DciA domains) (**Figure 6**). We also note that there are ABC  
255 transporter-like proteins within proteobacteria with ~30% similarity to the query DciA protein in  
256 acidobacteria, but none of the other 65 query proteins (**Figure 6**). Finally, we found that one query  
257 DciA from deferribacteres identifies peptidase-like proteins in proteobacteria, again with no  
258 similarity to any of the other divergent DciA proteins. The novel fusions and alternate domain

259 architectures identified within the bacterial DciA homologs have been summarized in the form of  
260 a network of domain architectures reconciling all DciA homologs, with domains as nodes and co-  
261 occurrence within proteins as edges, and their co-occurrences have been further quantified  
262 (**Figure 6**). The association of the DUF721 and DciA proteins with other functional domains could  
263 shed light on the activities for DciA in these bacteria.

264

265

## 266 **DISCUSSION**

267 The recent discovery of DciA as a predicted helicase operator in bacteria (28, 31) has begun to  
268 shed light on a long-standing open question of how the majority of bacteria facilitate helicase  
269 activity during DNA replication in the absence of the ATPase helicase loaders expressed by *E.*  
270 *coli* and *B. subtilis*. The wide distribution of DciA in diverse bacterial phyla indicates that these  
271 proteins likely represent the predominant paradigm for helicase operation in bacteria, despite not  
272 being conserved in *E. coli* and *B. subtilis*, the organisms typically used as a model for bacterial  
273 replication. DciA proteins are defined by the presence of the DUF721 domain and prior  
274 phylogenetic analysis indicates that *dnaC* and *dnaI* homologs were acquired through evolution at  
275 the expense of *dciA* (named for *dna[CI]* antecedent) (28), suggesting that DciA and DnaC/DnaI  
276 perform a common function. In addition, it has been shown that DciA interacts with the replicative  
277 helicase and is required for DNA replication and viability in the limited organisms it has been  
278 studied in (28, 31, 33). However, the mechanism by which DciA mediates replication initiation is  
279 still unknown. Our study has revealed immense diversity in DciA proteins, where there is low  
280 sequence similarity between homologs in different phyla (**Figures 1–3**), there are at least 4  
281 distinct classes based on the positioning of the DUF721 domain in the protein (**Figures 4–5**),  
282 there exist lineage-specific insertion sequences in the DUF721 domain of some proteobacterial  
283 species (**Figures 4, S2**), and some DciA proteins have evolved as fusions to other functional

284 domains (**Figure 6**). These data suggest that DciA proteins have been divergently evolving and  
285 the mechanism of helicase operation conferred by DciA may have distinct features dependent on  
286 the bacteria.

287 Biochemical and genetic studies have only been performed with *M. tuberculosis*, *P.*  
288 *aeruginosa*, and *V. cholerae* DciA proteins (28, 31–33). Our analyses demonstrate that the DciA  
289 homologs from these species have a number of distinct features, in addition to low sequence  
290 similarity, raising the question of how conserved their mechanisms of action will be. In particular,  
291 mycobacterial DciA is a Group 2 DciA protein with sequences predicted to be intrinsically  
292 disordered both N-terminal and C-terminal to the DUF721 (**Figures 4 and 5**). In contrast, *V.*  
293 *cholerae* and *P. aeruginosa* DciA proteins are classed as Group 3, with a long sequence extension  
294 C-terminal of the DUF721 (**Figure S2**).

295 The one feature conserved in all DciA homologs is the presence of the DUF721, which  
296 contains the DANL domain and is predicted to structurally resemble the N-terminus of DnaA (31).  
297 The N-terminus of DnaA is critical for the interaction of DnaA with the helicase and other  
298 regulators (42, 43), however, the role of the DciA DANL domain in the interaction with DnaB has  
299 yet to be established. A tryptophan residue conserved in the DANL domains of many DciA  
300 homologs has structural similarity to a phenylalanine residue in the DnaA N-terminus that has  
301 been predicted to have a key role in making contacts between DnaA and its interacting partners,  
302 including DnaB (31, 44). Mutation of the conserved tryptophan in the DANL domain of *M.*  
303 *tuberculosis* DciA results in slow growth and decreased DNA replication (31). This supports that  
304 the conserved tryptophan within the DANL domain plays a key role for DciA function *in vivo*,  
305 however that precise role has yet to be elucidated. It is also important to note that not all DciA  
306 homologs encode this tryptophan residue within their DANL domain (32) (**Figure S2**). In fact,  
307 there is considerable diversity in the DUF721 sequences between DciA homologs from different  
308 phyla, including an insertion in the DUF721 of some alphaproteobacteria DciA proteins, which is

309 not observed in the DciA proteins analyzed here from other classes (**Figure 4, Figure S2**).  
310 Therefore, even the defining DUF721 feature of DciA proteins has evolved, likely reflecting either  
311 lineage-specific adaptation in mechanism of action or mode of interaction with the replicative  
312 helicase.

313       There are multiple DciA homologs predicted to encode intrinsically disordered regions N-  
314 terminal and/or C-terminal to the DUF721 (**Figure 4**). The intrinsically disordered sequence C-  
315 terminal to the DUF721 in the *V. cholerae* Group 3 DciA protein enhances the association  
316 between DnaB and ssDNA and truncation of this intrinsically disordered sequence results in loss  
317 of the interaction between *V. cholerae* DciA and the DnaB helicase (32). Although it is unknown  
318 how much of this mechanism will be conserved in other bacterial species encoding DciA proteins  
319 with divergent domain architectures and many DciA proteins do not encode predicted intrinsically  
320 disordered regions, there is precedent for roles of intrinsically disordered domains in other  
321 bacterial DNA replication proteins. For example, the intrinsically disordered linker (IDL) within the  
322 C-terminus of SSB is important for its cooperative ssDNA binding, as well as the displacement of  
323 SSB from ssDNA (45, 46) (reviewed in (47)). The IDL has also been proposed to be important for  
324 SSB protein-protein interactions, such as the interaction between SSB and the DNA repair protein  
325 RecG (48). The intrinsically disordered C-terminus of the replication restart helicase Rep is also  
326 important for the interaction between Rep and its regulator PriC, as well as between Rep and the  
327 replicative helicase DnaB (49, 50). In addition, the helicase loaders DnaC and DnaI as well as the  
328 replication initiation protein DnaA have been predicted to encode intrinsically disordered domains,  
329 currently of unknown function (32).

330       A lot of unknowns still remain regarding DciA proteins and bacterial DNA replication. The  
331 computational evolutionary analysis described herein highlights the complexities and diversity  
332 that have evolved in the fundamental process of DNA replication, where no single species of  
333 bacteria will be able to represent a central dogma that holds true throughout the Kingdom. These

334 studies provide a framework for researchers to consider the evolutionary variation while dissecting  
335 the mechanistic basis for helicase operation in bacteria.

336

## 337 **METHODS**

### 338 **Query selection**

339 We selected our small and full set of DciA query proteins based on the DUF721 location defined  
340 by on Pfam annotation, using a variety of DciA containing phyla with annotated DciA sequences.  
341 The DciA domain was annotated using Pfam annotation and subsequently confirmed using a  
342 multiple sequence alignment (**Figure S2**). The full list of starting points is listed in **Table 1**. The  
343 only DciA-containing phyla excluded from our set of 66 query proteins were Deinococcus-  
344 Thermus, Chrysiogenetes, and Firmicutes. Firmicutes and Deinococcus-Thermus were  
345 subsequently recovered in our MolEvolvR searches.

346

### 347 **Analysis using MolEvolvR**

348 We used MolEvolvR (34) to determine and characterize all DciA query proteins and their  
349 homologs across the bacterial kingdom. We first identified all the homologs for each of the query  
350 proteins in RefSeq (51) genomes, and reconciled the comprehensive set of DciA homologous  
351 proteins. Next, we characterized each of the query proteins and their homologs in terms of domain  
352 architectures (including Pfam (52), Gene3D (53)), localization (using Phobius (54), TMHMM (55)),  
353 and disorder (using MobiDB (56)). The domain architectures of these homologs were analyzed  
354 by lineage, quantified with Upset plots, and reconciled using domain proximity networks. We then  
355 performed phylogenetic analysis including phyletic spreads (sunburst, heatmap), multiple  
356 sequence alignment, and tree construction using MolEvolvR and custom R scripts. The MSA for  
357 subset of the sequences with representatives from the 4 DciA groups shown in Figure SY was  
358 generated using Kalign (57) and Jalview (58). All our data, analyses, and visualizations

359 summarizing the DciA homologs across the bacterial kingdom along with their domain  
360 architectures and phyletic spreads are available at [https://github.com/JRaviLab/dcia\\_evolution](https://github.com/JRaviLab/dcia_evolution).

361

### 362 **Pairwise Similarity Analysis**

363 The similarity matrix was designed using the MatGat application (59). We compared each DciA  
364 query protein of the 21 starting points (**Figure 1**) to each other in order to calculate pairwise  
365 percent similarities. DnaB from *M. tuberculosis* and *P. aeruginosa* sequence similarity were  
366 compared using the EMBOSS Needle pairwise similarity tool (57).

367

### 368 **FIGURE LEGENDS**

369 **Figure 1. Query of DciA homologs using 20 DciA protein starting points reveals diversity**  
370 **across bacterial phyla. A. Lineages of query DciA proteins.** Sunburst plot showing the  
371 lineages of the 21 query DciA proteins. In each plot, the inner ring corresponds to the kingdom  
372 (bacteria, in this case), and the outer ring represents the distribution of phyla. **B. Lineages of**  
373 **DciA homologs.** Sunburst plot showing the phyletic spread of all the DciA homologs generated  
374 using the 21 starting points. **C. Phyletic spread of the DciA homologs by query.** The heatmap  
375 shows the presence/absence of homologs of DciA across bacterial lineages (columns) for each  
376 query DciA (rows). The color gradient indicates the highest number of homologs in a particular  
377 lineage. \*Note: The sunburst plots only display lineages of >0.1% fraction of total proteins. The  
378 heatmap gives the full picture.

379

380 **Figure 2. Pairwise similarity analysis of DciA proteins.** Pairwise percentage similarities for 21  
381 query DciA proteins across 11 phyla were computed using MatGat (59) and the standard  
382 BLOSUM62 matrix for similarity metric calculation.

383



384 **Figure 3. Retrieving DciA homologs using the extended query set of 66 DciA proteins. A,**  
385 **B. Lineages of query and homologous DciA proteins.** See Figure 1 for details. The three phyla  
386 excluded in the query searches were Deinococcus-Thermus, Chrysiogenetes, and Firmicutes. **C.**  
387 **Phyletic spread of the DciA homologs by query.** See Figure 1 for details. Deinococcus-  
388 Thermus and Firmicutes were both recovered in the resulting set of homologs. Our queries did  
389 not recover the DciA homologs in chrysiogenetes, suggesting that the homologs in this phylum  
390 are the most divergent in sequence from the query sequences.

391  
392 **Figure 4. Characterizing the full list (66) of DciA query proteins.**  
393 **The domain architectures and disorder predictions (left panel) of the 66 DciA query**  
394 **proteins are overlaid with the multiple sequence alignment (right), and phylogenetic tree**  
395 **(middle).** Each DciA protein is marked with the kingdom (B, bacteria), phylum (first 6 letters),  
396 Genus, and species (represented as '*Gspecies*'). The Pfam and MobiDB annotations for each  
397 domain prediction are shown in the legend (top). The colors in the multiple sequence alignment  
398 depiction correspond to different amino acids (bottom legend). The data was generated and  
399 visualized using the MolEvolvR web application. In addition, JronnWS (60) disorder predictions  
400 were performed within Jalview (58) (not shown here), where other DciA proteins such as *V.*  
401 *cholerae* show disorder regions.

402  
403 **Figure 5. DciA groups and their distribution within our query sequences.**

404 **A. Example domain architectures of each of the 4 groups of DciA homologs.** Group 1 DciA  
405 homologs have  $\leq 25$  aa on either side of the DUF721 (top, blue), Group 2 homologs have  $\leq 25$ aa  
406 C-terminal to the DUF721 (second, pink), Group 3 DciA homologs have  $\leq 25$ aa amino acids N-  
407 terminal to the DUF721 (third, orange), and Group 4 DciA homologs have  $> 25$ aa both N- and C-  
408 terminal to the DUF721 (bottom, teal). Graphics created using [BioRender.com](https://BioRender.com). **B. Distribution**

409 **of groups within Gram-positive and Gram-negative DciA query proteins.** Pie charts  
410 comparing the number of gram-positive and gram-negative bacteria that have DciA homologs in  
411 one of the 4 groups. Gram-positive (left), gram-negative (right). Percentages rounded to the  
412 nearest whole number. Details of group and Gram stain assignments of each DciA homolog are  
413 found in **Table 1**.

414  
415 **Figure 6. DciA partners. A. Domain proximity network.** The network visualizes co-occurring  
416 domains within all bacterial DciA homologs generated with our 66 starting points (**Figure 1**; **Table**  
417 **1**). The nodes and edges correspond to domains and co-occurrence of domains within a protein;  
418 the size corresponds to the frequency of occurrence with a minimum scaling factor. The full data  
419 can be accessed at [https://github.com/JRaviLab/dcia\\_evolution](https://github.com/JRaviLab/dcia_evolution). **B. Frequencies of co-**  
420 **occurring domains in DciA homologs.** Upset plot of the DciA homologs are shown. Blue  
421 histogram: Distribution of the predominant domains. Dots and connections: Combinations in  
422 which these domains come together in DciA domain architectures. Red histogram: Frequency of  
423 occurrences of domain architectures. Of these only the DciA containing domain architectures  
424 were used for alignments and phylogenetic trees.

425  
426  
427 **SUPPLEMENTARY FIGURES**

428 **Figure S1. Mycobacterium tuberculosis and Pseudomonas aeruginosa DciA proteins only**  
429 **identify DciA homologs in their respective phylum.** Heatmap description as in Figure 1.

430  
431 **Figure S2. Multiple sequence alignment of select DciA proteins.** Alignment of the 66 DciA  
432 proteins used in the full query set. Numbering of residues across the top of the alignment is based  
433 on the annotation *M. tuberculosis* DciA. Based on the numbering of *M. tuberculosis* residues, The

434 DUF721 domain falls between 75–162 amino acids (red box), the conserved tryptophan residue  
435 in the DANL domain is at position 133 (red star), and the insertion present in some  
436 alphaproteobacterial DciA proteins occurs after position 118 on the alignment. The multiple  
437 sequence alignment was generated with Kalign (57, 61) and visualized using Jalview (58); (color  
438 scheme: Clustalx).

439

### 440 **Figure S3. Full list representative homolog characterization (with DciA)**

441 The domain architectures, multiple sequence alignment, and phylogenetic tree were generated  
442 using representative DciA homologs (one per domain architecture per lineage). See Figure 4 for  
443 details.

## 444 **TABLES**

### 445 **Table 1. DciA query proteins used to identify homologs across the bacterial kingdoms.**

446 Protein, domain architecture, group, and lineage-related metadata for each of the 66 diverse  
447 starting points of DciA proteins across the bacterial kingdom are shown in this table. The full  
448 homolog data, analyses, and figures can be found here:  
449 [https://github.com/jravailab/dcia\\_evolution](https://github.com/jravailab/dcia_evolution).

450

451

## 452 **ACKNOWLEDGEMENTS**

453 We are very grateful to the Midwest Microbial Pathogenesis Conference (MMPC) 2021 organizers  
454 for providing HCB a travel award and opportunity to present the DciA story, and for providing an  
455 interactive venue for JR and JTB to start this collaboration with CLS and HCB.

456

457 **FUNDING**

458 CLS is supported by a Burroughs Wellcome Fund Investigator in the Pathogenesis of Infectious  
459 Disease Award. HCB is supported by the Sondra Schlesinger Student Fellowship in Molecular  
460 Microbiology. JR is supported by Michigan State University (MSU) College of Veterinary Medicine  
461 Endowed Research Funds and MSU start-up funds.

462

463 **DATA AVAILABILITY AND REUSE**

464 All the data, analyses, and visualizations are available in our GitHub repository,  
465 [https://github.com/JRaviLab/dcia\\_evolution](https://github.com/JRaviLab/dcia_evolution). Text, figures, and data are licensed under Creative  
466 Commons Attribution CC BY 4.0.

467

468 **REFERENCES**

- 469 1. Kaguni JM. 2011. Replication initiation at the Escherichia coli chromosomal origin. Current  
470 opinion in chemical biology, 2011/08/18 ed. 15:606–613.
- 471 2. Mott ML, Berger JM. 2007. DNA replication initiation: mechanisms and regulation in  
472 bacteria. Nature Reviews Microbiology 5:343–354.
- 473 3. Jameson KH, Wilkinson AJ. 2017. Control of Initiation of DNA Replication in Bacillus subtilis  
474 and Escherichia coli. Genes 8:22–22.
- 475 4. Fuller RS, Kornberg A. 1983. Purified dnaA protein in initiation of replication at the  
476 Escherichia coli chromosomal origin of replication. Proceedings of the National Academy  
477 of Sciences 80:5817 LP – 5821.
- 478 5. Fuller RS, Funnell BE, Kornberg A. 1984. The dnaA protein complex with the E. coli  
479 chromosomal replication origin (oriC) and other DNA sites. Cell 38:889–900.

- 480 6. Chodavarapu S, Kaguni JM. 2016. Replication Initiation in Bacteria. *Enzymes* 39:1–30.
- 481 7. Schaper S, Messer W. 1995. Interaction of the initiator protein DnaA of *Escherichia coli* with  
482 its DNA target. *The Journal of biological chemistry* 270:17622–17626.
- 483 8. O'Donnell M, Langston L, Stillman B. 2013. Principles and concepts of DNA replication in  
484 bacteria, archaea, and eukarya. *Cold Spring Harbor perspectives in biology* 5:a010108–  
485 a010108.
- 486 9. Bramhill D, Kornberg A. 1988. Duplex opening by dnaA protein at novel sequences in  
487 initiation of replication at the origin of the *E. coli* chromosome. *Cell* 52:743–755.
- 488 10. Meyer RR, Laine PS. 1990. The single-stranded DNA-binding protein of *Escherichia coli*.  
489 *Microbiological reviews* 54:342–380.
- 490 11. LeBowitz JH, McMacken R. 1986. The *Escherichia coli* dnaB replication protein is a DNA  
491 helicase. *The Journal of biological chemistry* 261:4738–4748.
- 492 12. Baker TA, Funnell BE, Kornberg A. 1987. Helicase action of dnaB protein during replication  
493 from the *Escherichia coli* chromosomal origin in vitro. *Journal of Biological Chemistry*  
494 262:6877–6885.
- 495 13. Lewis JS, Jergic S, Dixon NE. 2016. The *E. coli* DNA Replication Fork. *The Enzymes* 39:31–  
496 88.
- 497 14. Oakley AJ. 2019. A structural view of bacterial DNA replication. *Protein science: a*  
498 *publication of the Protein Society* 28:990–1004.
- 499 15. Gorbalenya AE, Koonin EV. 1993. Helicases: amino acid sequence comparisons and  
500 structure-function relationships. *Current Opinion in Structural Biology* 3:419–429.

- 501 16. Leipe DD, Aravind L, Grishin NV, Koonin EV. 2000. The bacterial replicative helicase DnaB  
502 evolved from a RecA duplication. *Genome research* 10:5–16.
- 503 17. Fernandez AJ, Berger JM. 2021. Mechanisms of hexameric helicases. *Critical Reviews in*  
504 *Biochemistry and Molecular Biology* 56:621–639.
- 505 18. Spinks RR, Spenkelink LM, Stratmann SA, Xu Z-Q, Stamford NPJ, Brown SE, Dixon NE,  
506 Jergic S, van Oijen AM. 2021. DnaB helicase dynamics in bacterial DNA replication resolved  
507 by single-molecule studies. *Nucleic acids research* 49:6804–6816.
- 508 19. Itsathitphaisarn O, Wing RA, Eliason WK, Wang J, Steitz TA. 2012. The hexameric helicase  
509 DnaB adopts a nonplanar conformation during translocation. *Cell* 151:267–277.
- 510 20. Nakayama N, Arai N, Kaziro Y, Arai K. 1984. Structural and functional studies of the dnaB  
511 protein using limited proteolysis. Characterization of domains for DNA-dependent ATP  
512 hydrolysis and for protein association in the primosome. *The Journal of biological chemistry*  
513 259:88–96.
- 514 21. Sakamoto Y, Nakai S, Moriya S, Yoshikawa H, Ogasawara N. 1995. The *Bacillus subtilis*  
515 dnaC gene encodes a protein homologous to the DnaB helicase of *Escherichia coli*.  
516 *Microbiology (Reading, England)* 141 ( Pt 3:641–644.
- 517 22. Liu B, Eliason WK, Steitz TA. 2013. Structure of a helicase–helicase loader complex reveals  
518 insights into the mechanism of bacterial primosome assembly. *Nat Commun* 4:2495.
- 519 23. Arias-Palomo E, Puri N, O’Shea Murray VL, Yan Q, Berger JM. 2019. Physical Basis for the  
520 Loading of a Bacterial Replicative Helicase onto DNA. *Molecular cell* 74:173-184.e4.

- 521 24. Kobori JA, Kornberg A. 1982. The *Escherichia coli* dnaC gene product. II. Purification,  
522 physical properties, and role in replication. *Journal of Biological Chemistry* 257:13763–  
523 13769.
- 524 25. Wahle E, Lasken RS, Kornberg A. 1989. The dnaB-dnaC replication protein complex of  
525 *Escherichia coli*. II. Role of the complex in mobilizing dnaB functions. *J Biol Chem*  
526 264:2469–2475.
- 527 26. Koonin EV. 1992. DnaC protein contains a modified ATP-binding motif and belongs to a  
528 novel family of ATPases including also DnaA. *Nucleic acids research* 20:1997–1997.
- 529 27. Bruand C, Farache M, McGovern S, Ehrlich SD, Polard P. 2001. DnaB, DnaD and Dnal  
530 proteins are components of the *Bacillus subtilis* replication restart primosome. *Molecular*  
531 *microbiology* 42:245–255.
- 532 28. Brézellec P, Vallet-Gely I, Possoz C, Quevillon-Cheruel S, Ferat J-L. 2016. DciA is an  
533 ancestral replicative helicase operator essential for bacterial replication initiation. *Nat*  
534 *Commun* 7.
- 535 29. Davey MJ, Fang L, McInerney P, Georgescu RE, O'Donnell M. 2002. The DnaC helicase  
536 loader is a dual ATP/ADP switch protein. *EMBO J* 21:3148–3159.
- 537 30. Ioannou C, Schaeffer PM, Dixon NE, Soultanas P. 2006. Helicase binding to Dnal exposes  
538 a cryptic DNA-binding site during helicase loading in *Bacillus subtilis*. *Nucleic Acids Res*  
539 34:5247–5258.

- 540 31. Mann KM, Huang DL, Hooppaw AJ, Logsdon MM, Richardson K, Lee HJ, Kimmey JM,  
541 Aldridge BB, Stallings CL. 2017. Rv0004 is a new essential member of the mycobacterial  
542 DNA replication machinery. *PLoS Genet* 13:e1007115.
- 543 32. Chan-Yao-Chong M, Marsin S, Quevillon-Cheruel S, Durand D, Ha-Duong T. 2020.  
544 Structural ensemble and biological activity of DciA intrinsically disordered region. *Journal*  
545 *of Structural Biology* 212:107573.
- 546 33. Marsin S, Adam Y, Cargemel C, Andreani J, Baconnais S, Legrand P, Li de la Sierra-Gallay  
547 I, Humbert A, Aumont-Nicaise M, Velours C, Ochsenbein F, Durand D, Le Cam E, Walbott  
548 H, Possoz C, Quevillon-Cheruel S, Ferat J-L. 2021. Study of the DnaB:DciA interplay reveals  
549 insights into the primary mode of loading of the bacterial replicative helicase. *Nucleic Acids*  
550 *Research* gkab463.
- 551 34. Joseph T Burke\*, Samuel Z Chen\*, Lauren M Sosinski\*, John B Johnson, Janani Ravi.  
552 MolEvolvR: A web-app for characterizing proteins using molecular evolution and  
553 phylogeny. In preparation.
- 554 35. Blackwell GA, Hunt M, Malone KM, Lima L, Horesh G, Alako BTF, Thomson NR, Iqbal Z.  
555 2021. Exploring bacterial diversity via a curated and searchable snapshot of archived DNA  
556 sequences. *PLoS biology* 19:e3001421–e3001421.
- 557 36. Land M, Hauser L, Jun S-R, Nookaew I, Leuze MR, Ahn T-H, Karpinets T, Lund O, Kora G,  
558 Wassenaar T, Poudel S, Ussery DW. 2015. Insights from 20 years of bacterial genome  
559 sequencing. *Functional & integrative genomics* 15:141–161.



- 560 37. Tatusova T, Ciufu S, Fedorov B, O'Neill K, Tolstoy I. 2014. RefSeq microbial genomes  
561 database: new representation and annotation strategy. *Nucleic Acids Research* 42:D553–  
562 D559.
- 563 38. Robinson A, Causer RJ, Dixon NE. 2012. Architecture and conservation of the bacterial  
564 DNA replication machinery, an underexploited drug target. *Current drug targets* 13:352–  
565 372.
- 566 39. Hug LA, Baker BJ, Anantharaman K, Brown CT, Probst AJ, Castelle CJ, Butterfield CN,  
567 Hermsdorf AW, Amano Y, Ise K, Suzuki Y, Dudek N, Relman DA, Finstad KM, Amundson R,  
568 Thomas BC, Banfield JF. 2016. A new view of the tree of life. *Nature Microbiology* 1:16048–  
569 16048.
- 570 40. Necci M, Piovesan D, Dosztányi Z, Tosatto SCE. 2017. MobiDB-lite: fast and highly specific  
571 consensus prediction of intrinsic disorder in proteins. *Bioinformatics (Oxford, England)*  
572 33:1402–1404.
- 573 41. Burroughs AM, Zhang D, Schäffer DE, Iyer LM, Aravind L. 2015. Comparative genomic  
574 analyses reveal a vast, novel network of nucleotide-centric systems in biological conflicts,  
575 immunity and signaling. *Nucleic acids research*, 2015/11/20 ed. 43:10633–10654.
- 576 42. Sutton MD, Carr KM, Vicente M, Kaguni JM. 1998. *Escherichia coli* DnaA protein. The N-  
577 terminal domain and loading of DnaB helicase at the *E. coli* chromosomal origin. *J Biol*  
578 *Chem* 273:34255–34262.
- 579 43. Abe Y, Jo T, Matsuda Y, Matsunaga C, Katayama T, Ueda T. 2007. Structure and function  
580 of DnaA N-terminal domains: specific sites and mechanisms in inter-DnaA interaction and  
581 in DnaB helicase loading on oriC. *The Journal of biological chemistry* 282:17816–17827.

- 582 44. Keyamura K, Abe Y, Higashi M, Ueda T, Katayama T. 2009. DiaA dynamics are coupled  
583 with changes in initial origin complexes leading to helicase loading. *The Journal of*  
584 *biological chemistry* 284:25038–25050.
- 585 45. Tan HY, Wilczek LA, Pottinger S, Manosas M, Yu C, Nguyenduc T, Bianco PR. 2017. The  
586 intrinsically disordered linker of *E. coli* SSB is critical for the release from single-stranded  
587 DNA. *Protein science: a publication of the Protein Society* 26:700–717.
- 588 46. Kozlov AG, Weiland E, Mittal A, Waldman V, Antony E, Fazio N, Pappu RV, Lohman TM.  
589 2015. Intrinsically Disordered C-Terminal Tails of *E. coli* Single-Stranded DNA Binding  
590 Protein Regulate Cooperative Binding to Single-Stranded DNA. *Journal of Molecular*  
591 *Biology* 427:763–774.
- 592 47. Antony E, Lohman TM. 2019. Dynamics of *E. coli* single stranded DNA binding (SSB)  
593 protein-DNA complexes. *Seminars in cell & developmental biology* 86:102–111.
- 594 48. Bianco PR, Pottinger S, Tan HY, Nguyenduc T, Rex K, Varshney U. 2017. The IDL of *E. coli*  
595 SSB links ssDNA and protein binding by mediating protein-protein interactions. *Protein*  
596 *science: a publication of the Protein Society* 26:227–241.
- 597 49. Guy CP, Atkinson J, Gupta MK, Mahdi AA, Gwynn EJ, Rudolph CJ, Moon PB, van  
598 Knippenberg IC, Cadman CJ, Dillingham MS, Lloyd RG, McGlynn P. 2009. Rep Provides a  
599 Second Motor at the Replisome to Promote Duplication of Protein-Bound DNA. *Molecular*  
600 *Cell* 36:654–666.
- 601 50. Nguyen B, Shinn MK, Weiland E, Lohman TM. 2021. Regulation of *E. coli* Rep helicase  
602 activity by PriC. *Journal of Molecular Biology* 433:167072–167072.

- 603 51. O’Leary NA, Wright MW, Brister JR, Ciufu S, Haddad D, McVeigh R, Rajput B, Robbertse  
604 B, Smith-White B, Ako-Adjei D, Astashyn A, Badretdin A, Bao Y, Blinkova O, Brover V,  
605 Chetvernin V, Choi J, Cox E, Ermolaeva O, Farrell CM, Goldfarb T, Gupta T, Haft D, Hatcher  
606 E, Hlavina W, Joardar VS, Kodali VK, Li W, Maglott D, Masterson P, McGarvey KM, Murphy  
607 MR, O’Neill K, Pujar S, Rangwala SH, Rausch D, Riddick LD, Schoch C, Shkeda A, Storz  
608 SS, Sun H, Thibaud-Nissen F, Tolstoy I, Tully RE, Vatsan AR, Wallin C, Webb D, Wu W,  
609 Landrum MJ, Kimchi A, Tatusova T, DiCuccio M, Kitts P, Murphy TD, Pruitt KD. 2016.  
610 Reference sequence (RefSeq) database at NCBI: current status, taxonomic expansion, and  
611 functional annotation. *Nucleic acids research* 44:D733-45.
- 612 52. Mistry J, Chuguransky S, Williams L, Qureshi M, Salazar GA, Sonnhammer ELL, Tosatto  
613 SCE, Paladin L, Raj S, Richardson LJ, Finn RD, Bateman A. 2021. Pfam: The protein families  
614 database in 2021. *Nucleic Acids Research* 49:D412–D419.
- 615 53. Nowotny J, Ahmed S, Xu L, Oluwadare O, Chen H, Hensley N, Trieu T, Cao R, Cheng J.  
616 2015. Iterative reconstruction of three-dimensional models of human chromosomes from  
617 chromosomal contact data. *BMC bioinformatics* 16:338–338.
- 618 54. Käll L, Krogh A, Sonnhammer ELL. 2004. A combined transmembrane topology and signal  
619 peptide prediction method. *Journal of molecular biology* 338:1027–1036.
- 620 55. Möller S, Croning MD, Apweiler R. 2001. Evaluation of methods for the prediction of  
621 membrane spanning regions. *Bioinformatics (Oxford, England)* 17:646–653.
- 622 56. Piovesan D, Necci M, Escobedo N, Monzon AM, Hatos A, Mičetić I, Quaglia F, Paladin L,  
623 Ramasamy P, Dosztányi Z, Vranken WF, Davey NE, Parisi G, Fuxreiter M, Tosatto SCE.

- 624           2021. MobiDB: intrinsically disordered proteins in 2021. *Nucleic acids research* 49:D361–  
625           D367.
- 626   57. Madeira F, Park YM, Lee J, Buso N, Gur T, Madhusoodanan N, Basutkar P, Tivey ARN,  
627           Potter SC, Finn RD, Lopez R. 2019. The EMBL-EBI search and sequence analysis tools  
628           APIs in 2019. *Nucleic acids research* 47:W636–W641.
- 629   58. Waterhouse AM, Procter JB, Martin DMA, Clamp M, Barton GJ. 2009. Jalview Version 2—  
630           a multiple sequence alignment editor and analysis workbench. *Bioinformatics* 25:1189–  
631           1191.
- 632   59. Campanella JJ, Bitincka L, Smalley J. 2003. MatGAT: An application that generates  
633           similarity/identity matrices using protein or DNA sequences. *BMC Bioinformatics* 4:29–29.
- 634   60. Troshin PV, Procter JB, Barton GJ. 2011. Java bioinformatics analysis web services for  
635           multiple sequence alignment—JABAWS:MSA. *Bioinformatics* 27:2001–2002.
- 636   61. Lassmann T. 2020. Kalign 3: multiple sequence alignment of large datasets. *Bioinformatics*  
637           36:1928–1929.
- 638

Figure 1

### A Query distribution

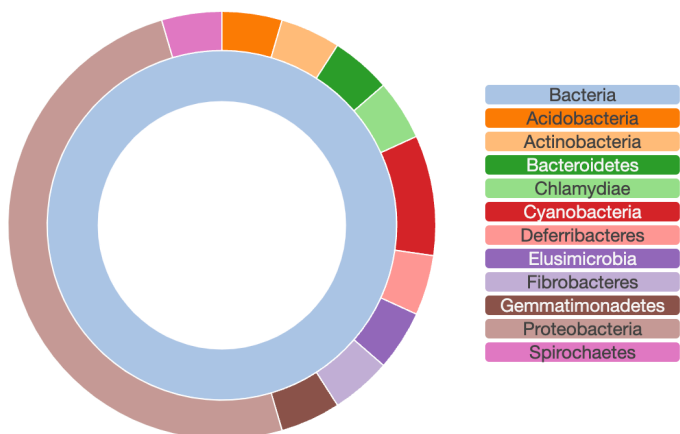

### B Homolog distribution

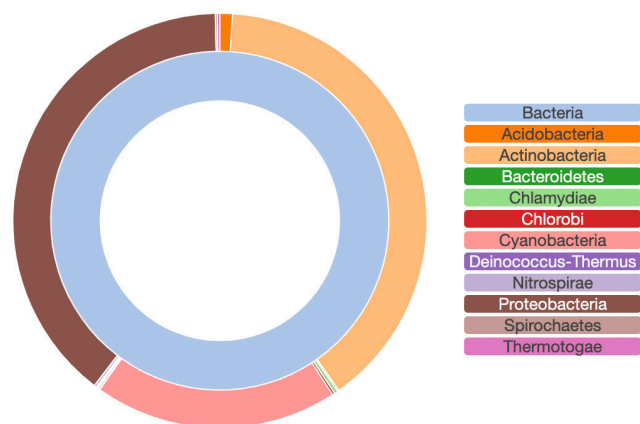

### C Phyletic spread of homologs (lineages)

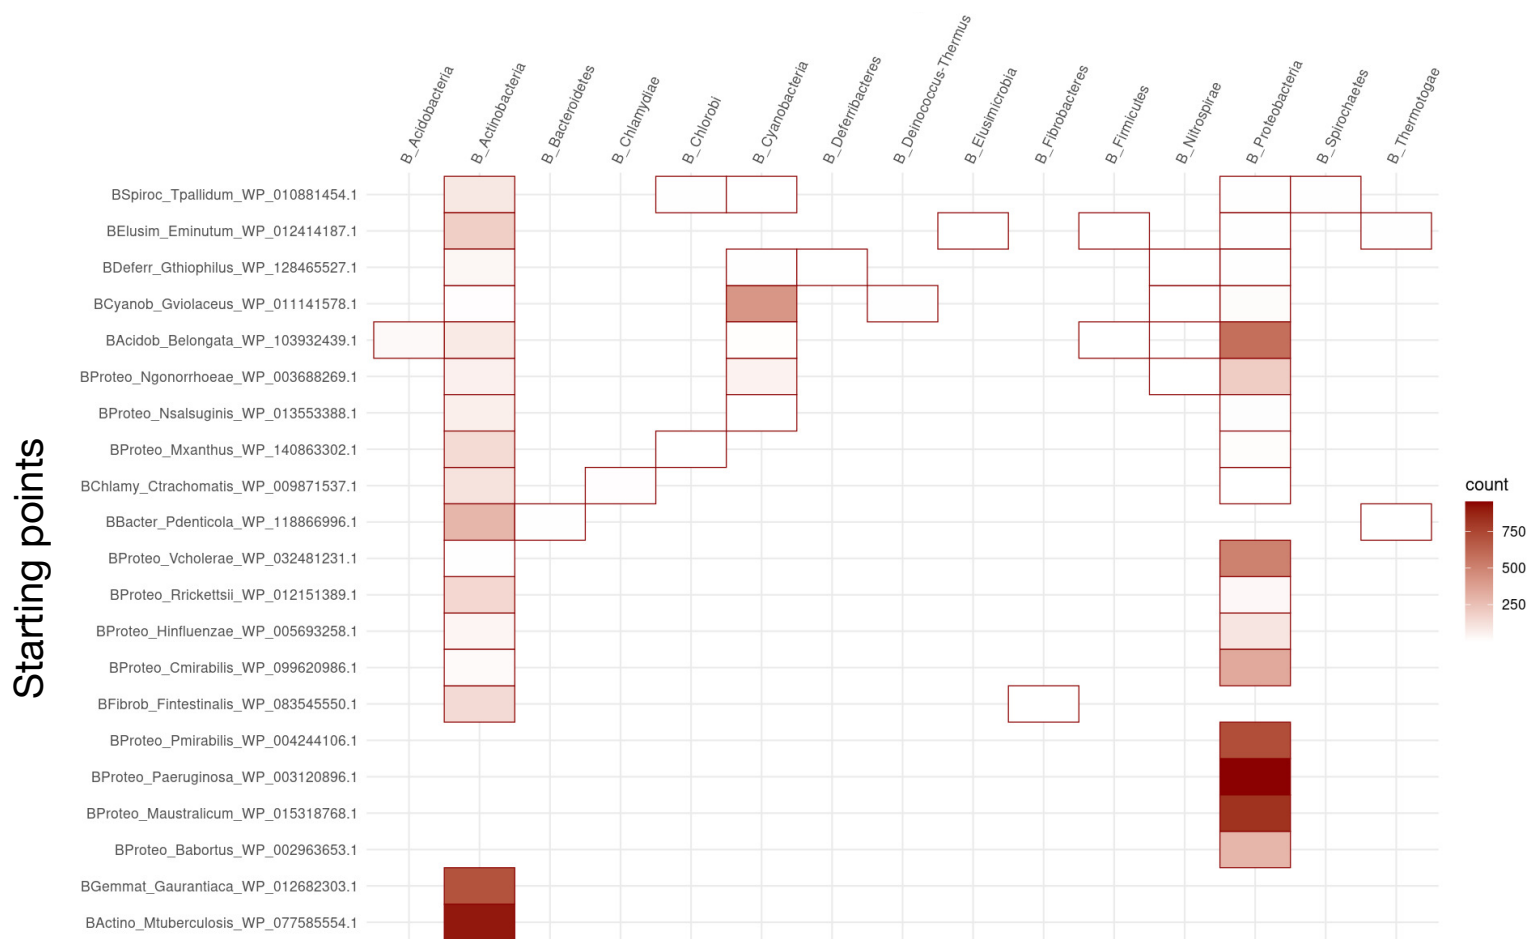

Figure 2

| Phylum           | Species                           | B. elo | M. tub | P. den | C. tra | G. vio | G. thio | E. min | F. int | G. aur | B. abo | P. aer | N. gon | P. mir | H. inf | R. ric | N. sal | M. aus | V. cho | C. mir | M. xan | T. pal |  |
|------------------|-----------------------------------|--------|--------|--------|--------|--------|---------|--------|--------|--------|--------|--------|--------|--------|--------|--------|--------|--------|--------|--------|--------|--------|--|
| Acidobacteria    | <i>Bryocella elongata</i>         |        |        |        |        |        |         |        |        |        |        |        |        |        |        |        |        |        |        |        |        |        |  |
| Actinobacteria   | <i>Mycobacterium tuberculosis</i> | 23.0   |        |        |        |        |         |        |        |        |        |        |        |        |        |        |        |        |        |        |        |        |  |
| Bacteroidetes    | <i>Prevotella denticola</i>       | 42.3   | 26.2   |        |        |        |         |        |        |        |        |        |        |        |        |        |        |        |        |        |        |        |  |
| Chlamydiae       | <i>Chlamydia trachomatis</i>      | 31.9   | 28.9   | 41.4   |        |        |         |        |        |        |        |        |        |        |        |        |        |        |        |        |        |        |  |
| Cyanobacteria    | <i>Gloeobacter violaceus</i>      | 26.7   | 33.2   | 26.1   | 28.9   |        |         |        |        |        |        |        |        |        |        |        |        |        |        |        |        |        |  |
| Deferribacteres  | <i>Geovibrio thiophilus</i>       | 32.9   | 28.9   | 27.4   | 30.8   | 34.4   |         |        |        |        |        |        |        |        |        |        |        |        |        |        |        |        |  |
| Elusimicrobia    | <i>Elusimicrobium minutum</i>     | 38.5   | 21.4   | 38.8   | 39.7   | 26.1   | 29.5    |        |        |        |        |        |        |        |        |        |        |        |        |        |        |        |  |
| Fibrobacteres    | <i>Fibrobacter intestinalis</i>   | 36.3   | 27.3   | 41.6   | 42.2   | 26.7   | 30.8    | 35.4   |        |        |        |        |        |        |        |        |        |        |        |        |        |        |  |
| Gemmatimonadetes | <i>Gemmatimonas aurantiaca</i>    | 39.4   | 28.3   | 43.7   | 41.4   | 28.3   | 33.6    | 38.8   | 34.5   |        |        |        |        |        |        |        |        |        |        |        |        |        |  |
| Proteobacteria   | <i>Brucella abortus</i>           | 25.1   | 31.0   | 26.3   | 29.1   | 33.3   | 32.6    | 20.6   | 25.7   | 33.1   |        |        |        |        |        |        |        |        |        |        |        |        |  |
| Proteobacteria   | <i>Pseudomonas aeruginosa</i>     | 29.8   | 28.3   | 31.3   | 31.3   | 30.0   | 34.2    | 30.5   | 31.3   | 29.8   | 36.0   |        |        |        |        |        |        |        |        |        |        |        |  |
| Proteobacteria   | <i>Neisseria gonorrhoeae</i>      | 30.7   | 29.9   | 29.3   | 29.3   | 32.8   | 37.0    | 25.7   | 28.6   | 29.3   | 34.9   | 39.3   |        |        |        |        |        |        |        |        |        |        |  |
| Proteobacteria   | <i>Proteus mirabilis</i>          | 26.2   | 29.9   | 26.7   | 32.0   | 38.3   | 39.0    | 29.1   | 32.0   | 24.4   | 40.0   | 44.2   | 38.4   |        |        |        |        |        |        |        |        |        |  |
| Proteobacteria   | <i>Haemophilus influenzae</i>     | 35.6   | 23.0   | 40.4   | 38.8   | 23.3   | 29.5    | 42.3   | 39.8   | 36.5   | 21.1   | 28.2   | 26.4   | 26.7   |        |        |        |        |        |        |        |        |  |
| Proteobacteria   | <i>Rickettsia rickettsii</i>      | 30.8   | 25.7   | 43.9   | 39.7   | 26.1   | 31.5    | 38.3   | 39.8   | 36.4   | 26.9   | 30.5   | 30.0   | 26.7   | 32.7   |        |        |        |        |        |        |        |  |
| Proteobacteria   | <i>Nitratifractor salsuginis</i>  | 24.8   | 26.7   | 24.8   | 22.9   | 30.6   | 32.7    | 28.8   | 29.4   | 26.1   | 29.7   | 27.5   | 30.7   | 32.6   | 27.5   | 33.3   |        |        |        |        |        |        |  |
| Proteobacteria   | <i>Mesorhizobium australicum</i>  | 25.9   | 32.1   | 24.7   | 27.1   | 37.2   | 34.3    | 23.5   | 27.1   | 27.7   | 62.3   | 37.3   | 35.5   | 37.2   | 29.5   | 27.1   | 28.9   |        |        |        |        |        |  |
| Proteobacteria   | <i>Vibrio cholerae</i>            | 27.4   | 27.8   | 26.1   | 32.5   | 32.2   | 29.9    | 26.1   | 30.6   | 36.3   | 33.1   | 42.0   | 38.9   | 52.3   | 30.6   | 32.5   | 35.7   | 34.9   |        |        |        |        |  |
| Proteobacteria   | <i>Caulobacter mirabilis</i>      | 28.0   | 34.8   | 26.9   | 27.5   | 40.7   | 34.1    | 22.0   | 25.3   | 28.0   | 47.8   | 28.6   | 35.2   | 34.1   | 23.1   | 27.5   | 33.0   | 46.2   | 35.7   |        |        |        |  |
| Proteobacteria   | <i>Myxococcus xanthus</i>         | 38.5   | 28.3   | 42.6   | 32.8   | 26.7   | 31.5    | 34.7   | 40.7   | 41.7   | 26.9   | 31.3   | 29.3   | 26.2   | 27.9   | 40.2   | 25.5   | 30.1   | 22.9   | 26.9   |        |        |  |
| Spirochaetes     | <i>Treponema pallidum</i>         | 31.0   | 31.0   | 28.3   | 29.7   | 31.1   | 39.0    | 28.3   | 26.2   | 32.4   | 29.7   | 36.6   | 31.7   | 38.4   | 34.5   | 29.7   | 35.3   | 34.3   | 37.6   | 31.9   | 26.9   |        |  |

Figure 3

### A Query distribution

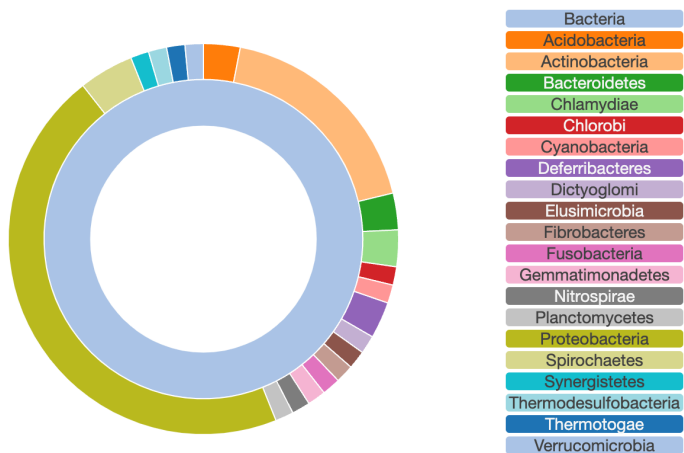

### B Homolog distribution

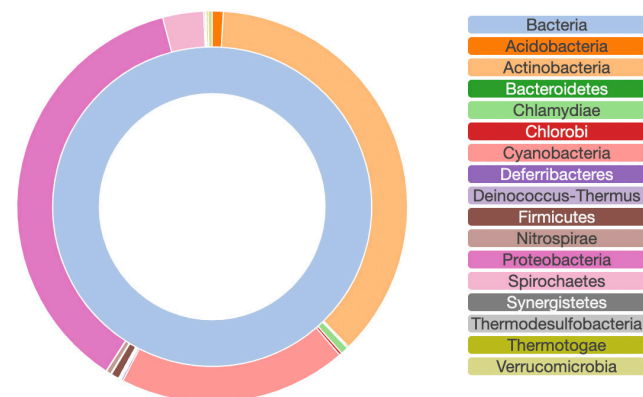

### C Phyletic spread of homologs (lineages)

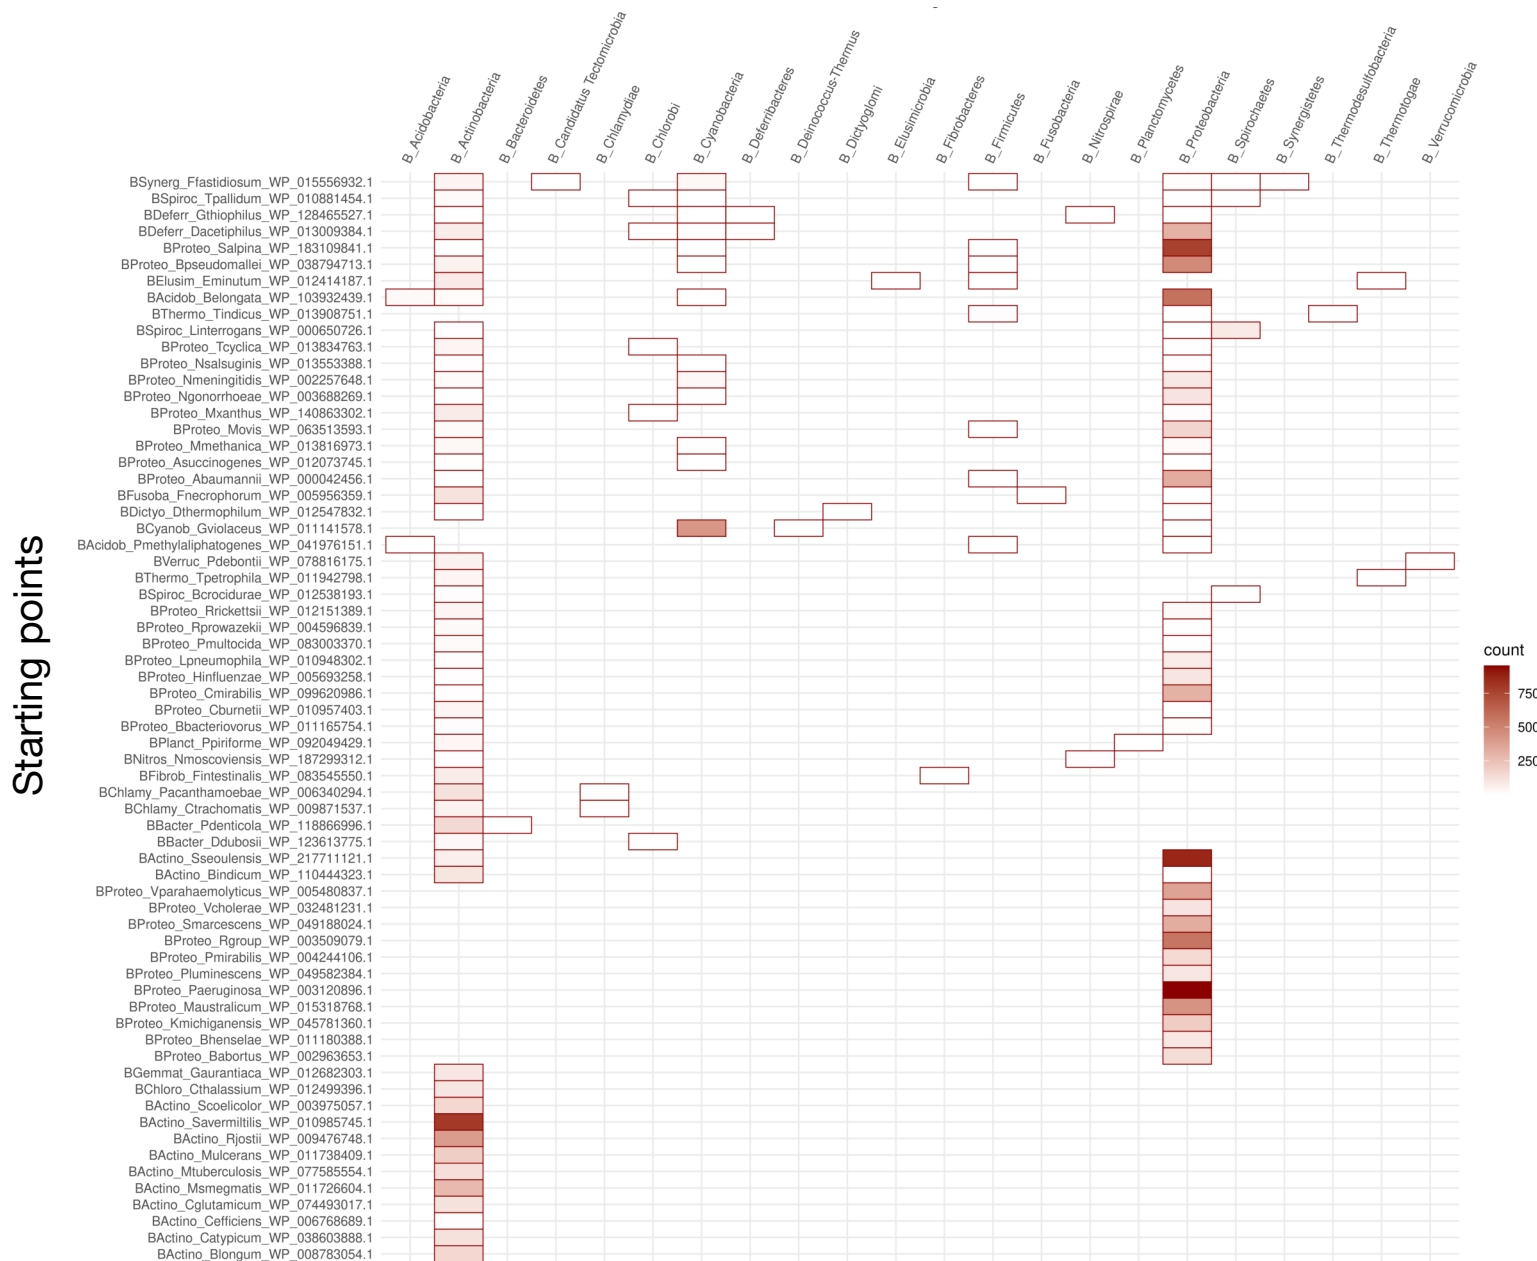

Figure 4

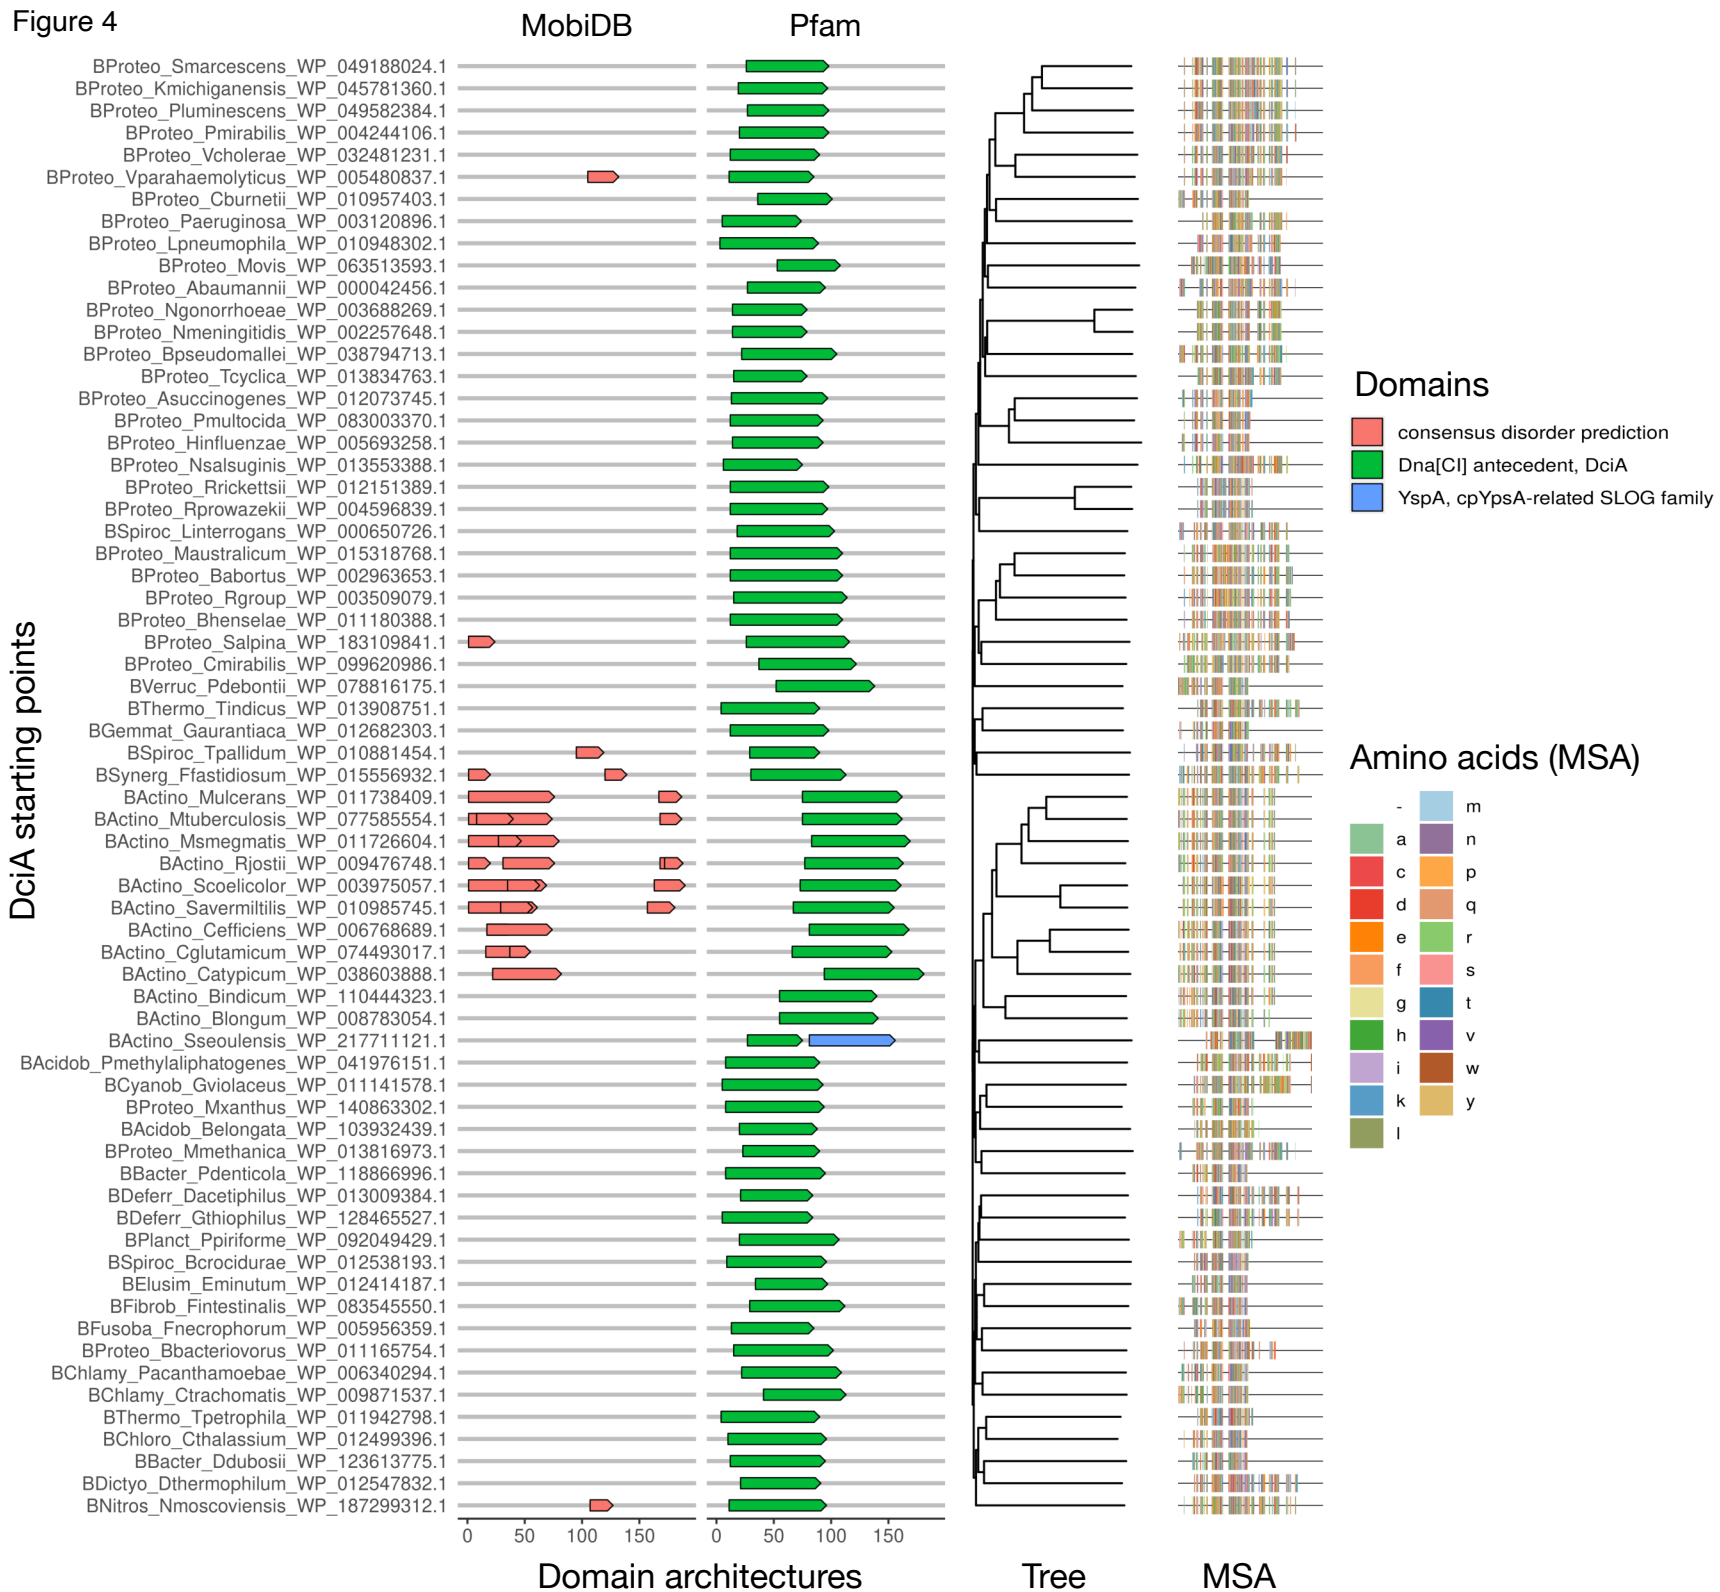



Figure 5

**A**

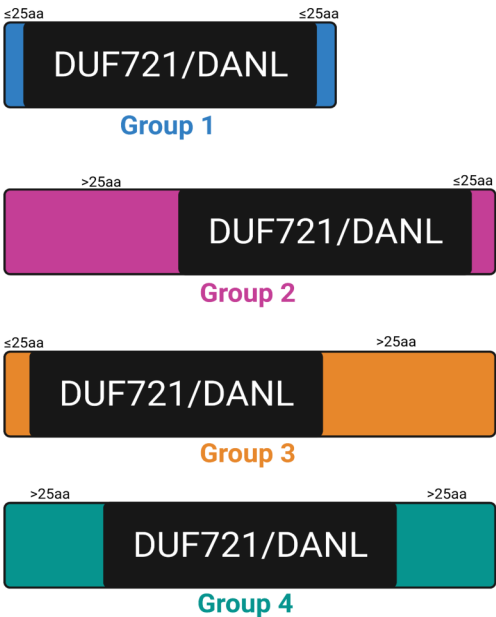

- Acidobacteria (2)
- Actinobacteria (12)
- Bacteroidetes (2)
- Chlamydiae (2)
- Chlorobi (1)
- Cyanobacteria (1)
- Deferribacteres (2)
- Dictyoglomi (1)
- Elusimicrobia (1)
- Fibrobacteres (1)
- Fusobacteria (1)
- Gemmatimonadetes (1)
- Nitrospirae (1)
- Planctomycetes (1)
- Proteobacteria (30)
- Spirochaetes (3)
- Synergistetes (1)
- Thermodesulfobacteria (1)
- Thermotogae (1)
- Verrucomicrobiae (1)

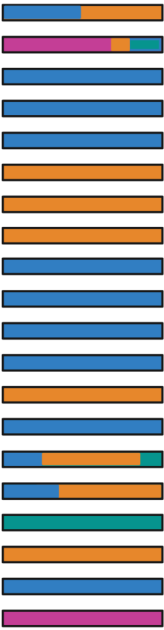

Gram Positive Bacteria (12)

Gram Negative Bacteria (54)

**B**

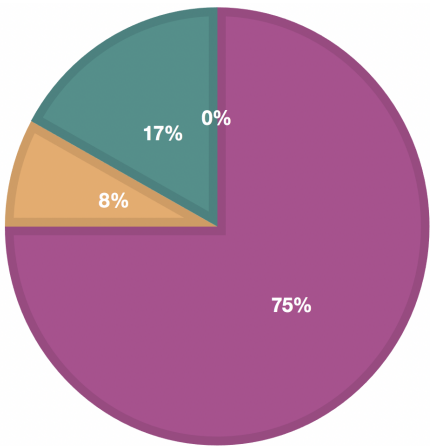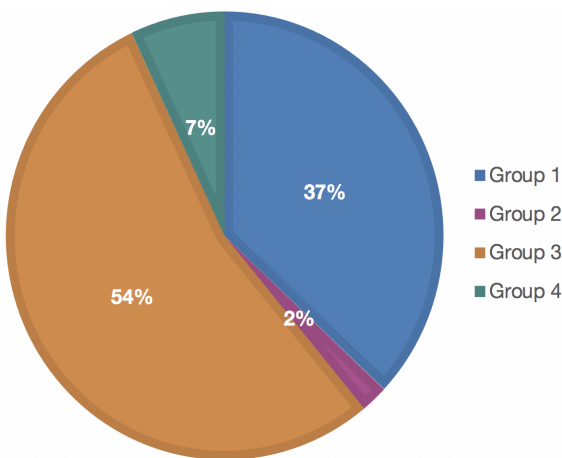

## A Domain proximity network

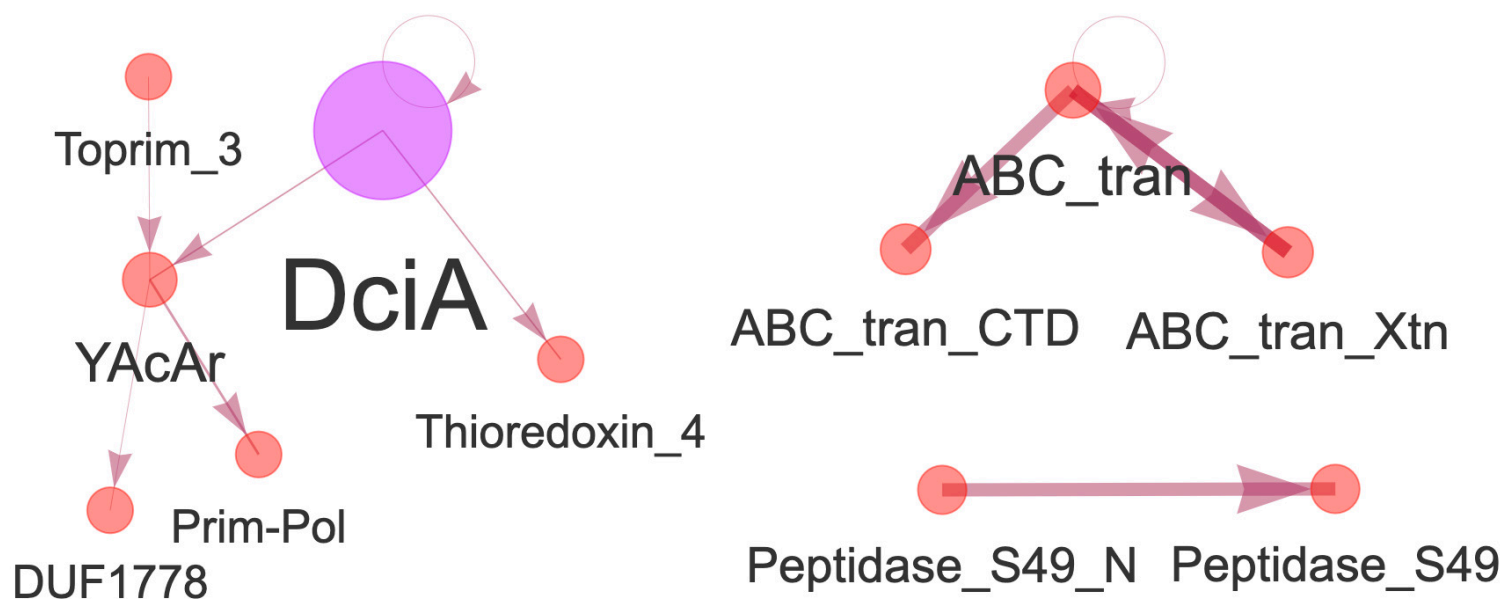

## B Domain co-occurrence frequency

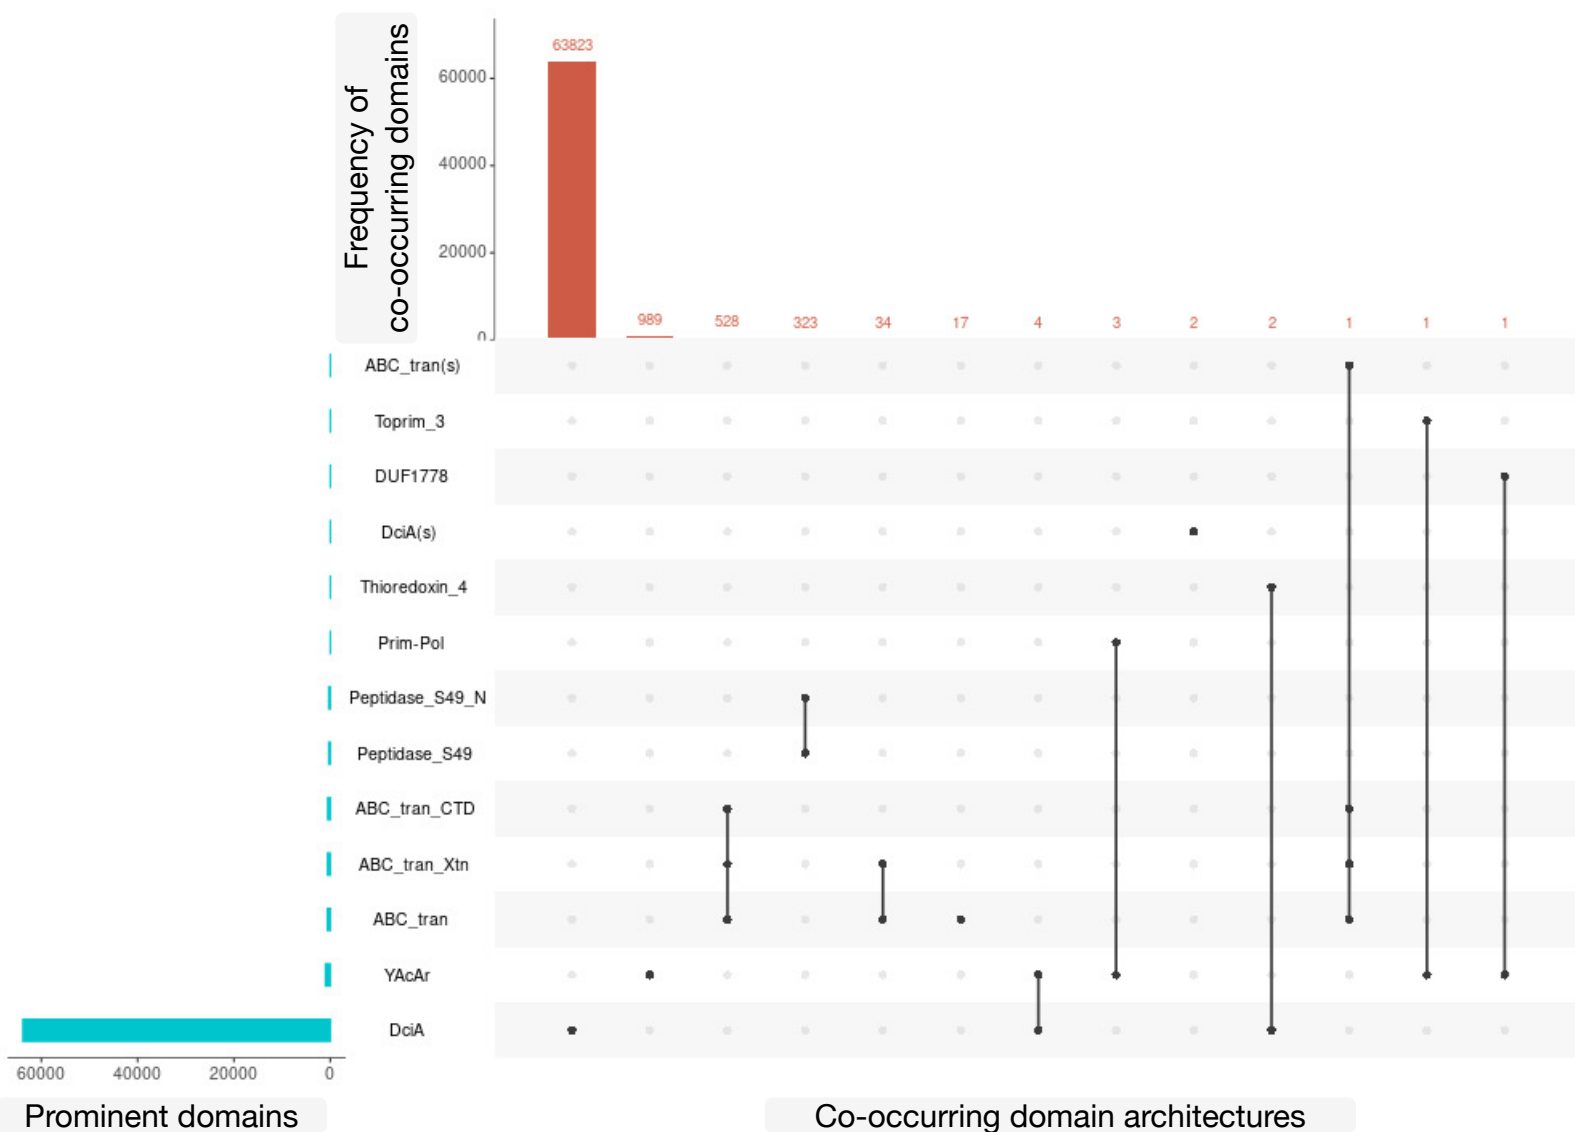

| Accession        | Gene        | Species        | Strain | Accession   | Gene | Species | Strain |
|------------------|-------------|----------------|--------|-------------|------|---------|--------|
| Phage T400000001 | MP101000001 | Parvovirus sp. | 001    | MP101000001 | NS   | 001     | 001    |
| Phage T400000002 | MP101000002 | Parvovirus sp. | 002    | MP101000002 | NS   | 002     | 002    |
| Phage T400000003 | MP101000003 | Parvovirus sp. | 003    | MP101000003 | NS   | 003     | 003    |
| Phage T400000004 | MP101000004 | Parvovirus sp. | 004    | MP101000004 | NS   | 004     | 004    |
| Phage T400000005 | MP101000005 | Parvovirus sp. | 005    | MP101000005 | NS   | 005     | 005    |
| Phage T400000006 | MP101000006 | Parvovirus sp. | 006    | MP101000006 | NS   | 006     | 006    |
| Phage T400000007 | MP101000007 | Parvovirus sp. | 007    | MP101000007 | NS   | 007     | 007    |
| Phage T400000008 | MP101000008 | Parvovirus sp. | 008    | MP101000008 | NS   | 008     | 008    |
| Phage T400000009 | MP101000009 | Parvovirus sp. | 009    | MP101000009 | NS   | 009     | 009    |
| Phage T400000010 | MP101000010 | Parvovirus sp. | 010    | MP101000010 | NS   | 010     | 010    |
| Phage T400000011 | MP101000011 | Parvovirus sp. | 011    | MP101000011 | NS   | 011     | 011    |
| Phage T400000012 | MP101000012 | Parvovirus sp. | 012    | MP101000012 | NS   | 012     | 012    |
| Phage T400000013 | MP101000013 | Parvovirus sp. | 013    | MP101000013 | NS   | 013     | 013    |
| Phage T400000014 | MP101000014 | Parvovirus sp. | 014    | MP101000014 | NS   | 014     | 014    |
| Phage T400000015 | MP101000015 | Parvovirus sp. | 015    | MP101000015 | NS   | 015     | 015    |
| Phage T400000016 | MP101000016 | Parvovirus sp. | 016    | MP101000016 | NS   | 016     | 016    |
| Phage T400000017 | MP101000017 | Parvovirus sp. | 017    | MP101000017 | NS   | 017     | 017    |
| Phage T400000018 | MP101000018 | Parvovirus sp. | 018    | MP101000018 | NS   | 018     | 018    |
| Phage T400000019 | MP101000019 | Parvovirus sp. | 019    | MP101000019 | NS   | 019     | 019    |
| Phage T400000020 | MP101000020 | Parvovirus sp. | 020    | MP101000020 | NS   | 020     | 020    |
| Phage T400000021 | MP101000021 | Parvovirus sp. | 021    | MP101000021 | NS   | 021     | 021    |
| Phage T400000022 | MP101000022 | Parvovirus sp. | 022    | MP101000022 | NS   | 022     | 022    |
| Phage T400000023 | MP101000023 | Parvovirus sp. | 023    | MP101000023 | NS   | 023     | 023    |
| Phage T400000024 | MP101000024 | Parvovirus sp. | 024    | MP101000024 | NS   | 024     | 024    |
| Phage T400000025 | MP101000025 | Parvovirus sp. | 025    | MP101000025 | NS   | 025     | 025    |
| Phage T400000026 | MP101000026 | Parvovirus sp. | 026    | MP101000026 | NS   | 026     | 026    |
| Phage T400000027 | MP101000027 | Parvovirus sp. | 027    | MP101000027 | NS   | 027     | 027    |
| Phage T400000028 | MP101000028 | Parvovirus sp. | 028    | MP101000028 | NS   | 028     | 028    |
| Phage T400000029 | MP101000029 | Parvovirus sp. | 029    | MP101000029 | NS   | 029     | 029    |
| Phage T400000030 | MP101000030 | Parvovirus sp. | 030    | MP101000030 | NS   | 030     | 030    |
| Phage T400000031 | MP101000031 | Parvovirus sp. | 031    | MP101000031 | NS   | 031     | 031    |
| Phage T400000032 | MP101000032 | Parvovirus sp. | 032    | MP101000032 | NS   | 032     | 032    |
| Phage T400000033 | MP101000033 | Parvovirus sp. | 033    | MP101000033 | NS   | 033     | 033    |
| Phage T400000034 | MP101000034 | Parvovirus sp. | 034    | MP101000034 | NS   | 034     | 034    |
| Phage T400000035 | MP101000035 | Parvovirus sp. | 035    | MP101000035 | NS   | 035     | 035    |
| Phage T400000036 | MP101000036 | Parvovirus sp. | 036    | MP101000036 | NS   | 036     | 036    |
| Phage T400000037 | MP101000037 | Parvovirus sp. | 037    | MP101000037 | NS   | 037     | 037    |
| Phage T400000038 | MP101000038 | Parvovirus sp. | 038    | MP101000038 | NS   | 038     | 038    |
| Phage T400000039 | MP101000039 | Parvovirus sp. | 039    | MP101000039 | NS   | 039     | 039    |
| Phage T400000040 | MP101000040 | Parvovirus sp. | 040    | MP101000040 | NS   | 040     | 040    |
| Phage T400000041 | MP101000041 | Parvovirus sp. | 041    | MP101000041 | NS   | 041     | 041    |
| Phage T400000042 | MP101000042 | Parvovirus sp. | 042    | MP101000042 | NS   | 042     | 042    |
| Phage T400000043 | MP101000043 | Parvovirus sp. | 043    | MP101000043 | NS   | 043     | 043    |
| Phage T400000044 | MP101000044 | Parvovirus sp. | 044    | MP101000044 | NS   | 044     | 044    |
| Phage T400000045 | MP101000045 | Parvovirus sp. | 045    | MP101000045 | NS   | 045     | 045    |
| Phage T400000046 | MP101000046 | Parvovirus sp. | 046    | MP101000046 | NS   | 046     | 046    |
| Phage T400000047 | MP101000047 | Parvovirus sp. | 047    | MP101000047 | NS   | 047     | 047    |
| Phage T400000048 | MP101000048 | Parvovirus sp. | 048    | MP101000048 | NS   | 048     | 048    |
| Phage T400000049 | MP101000049 | Parvovirus sp. | 049    | MP101000049 | NS   | 049     | 049    |
| Phage T400000050 | MP101000050 | Parvovirus sp. | 050    | MP101000050 | NS   | 050     | 050    |
| Phage T400000051 | MP101000051 | Parvovirus sp. | 051    | MP101000051 | NS   | 051     | 051    |
| Phage T400000052 | MP101000052 | Parvovirus sp. | 052    | MP101000052 | NS   | 052     | 052    |
| Phage T400000053 | MP101000053 | Parvovirus sp. | 053    | MP101000053 | NS   | 053     | 053    |
| Phage T400000054 | MP101000054 | Parvovirus sp. | 054    | MP101000054 | NS   | 054     | 054    |
| Phage T400000055 | MP101000055 | Parvovirus sp. | 055    | MP101000055 | NS   | 055     | 055    |
| Phage T400000056 | MP101000056 | Parvovirus sp. | 056    | MP101000056 | NS   | 056     | 056    |
| Phage T400000057 | MP101000057 | Parvovirus sp. | 057    | MP101000057 | NS   | 057     | 057    |
| Phage T400000058 | MP101000058 | Parvovirus sp. | 058    | MP101000058 | NS   | 058     | 058    |
| Phage T400000059 | MP101000059 | Parvovirus sp. | 059    | MP101000059 | NS   | 059     | 059    |
| Phage T400000060 | MP101000060 | Parvovirus sp. | 060    | MP101000060 | NS   | 060     | 060    |
| Phage T400000061 | MP101000061 | Parvovirus sp. | 061    | MP101000061 | NS   | 061     | 061    |
| Phage T400000062 | MP101000062 | Parvovirus sp. | 062    | MP101000062 | NS   | 062     | 062    |
| Phage T400000063 | MP101000063 | Parvovirus sp. | 063    | MP101000063 | NS   | 063     | 063    |
| Phage T400000064 | MP101000064 | Parvovirus sp. | 064    | MP101000064 | NS   | 064     | 064    |
| Phage T400000065 | MP101000065 | Parvovirus sp. | 065    | MP101000065 | NS   | 065     | 065    |
| Phage T400000066 | MP101000066 | Parvovirus sp. | 066    | MP101000066 | NS   | 066     | 066    |
| Phage T400000067 | MP101000067 | Parvovirus sp. | 067    | MP101000067 | NS   | 067     | 067    |
| Phage T400000068 | MP101000068 | Parvovirus sp. | 068    | MP101000068 | NS   | 068     | 068    |
| Phage T400000069 | MP101000069 | Parvovirus sp. | 069    | MP101000069 | NS   | 069     | 069    |
| Phage T400000070 | MP101000070 | Parvovirus sp. | 070    | MP101000070 | NS   | 070     | 070    |
| Phage T400000071 | MP101000071 | Parvovirus sp. | 071    | MP101000071 | NS   | 071     | 071    |
| Phage T400000072 | MP101000072 | Parvovirus sp. | 072    | MP101000072 | NS   | 072     | 072    |
| Phage T400000073 | MP101000073 | Parvovirus sp. | 073    | MP101000073 | NS   | 073     | 073    |
| Phage T400000074 | MP101000074 | Parvovirus sp. | 074    | MP101000074 | NS   | 074     | 074    |
| Phage T400000075 | MP101000075 | Parvovirus sp. | 075    | MP101000075 | NS   | 075     | 075    |
| Phage T400000076 | MP101000076 | Parvovirus sp. | 076    | MP101000076 | NS   | 076     | 076    |
| Phage T400000077 | MP101000077 | Parvovirus sp. | 077    | MP101000077 | NS   | 077     | 077    |
| Phage T400000078 | MP101000078 | Parvovirus sp. | 078    | MP101000078 | NS   | 078     | 078    |
| Phage T400000079 | MP101000079 | Parvovirus sp. | 079    | MP101000079 | NS   | 079     | 079    |
| Phage T400000080 | MP101000080 | Parvovirus sp. | 080    | MP101000080 | NS   | 080     | 080    |
| Phage T400000081 | MP101000081 | Parvovirus sp. | 081    | MP101000081 | NS   | 081     | 081    |
| Phage T400000082 | MP101000082 | Parvovirus sp. | 082    | MP101000082 | NS   | 082     | 082    |
| Phage T400000083 | MP101000083 | Parvovirus sp. | 083    | MP101000083 | NS   | 083     | 083    |
| Phage T400000084 | MP101000084 | Parvovirus sp. | 084    | MP101000084 | NS   | 084     | 084    |
| Phage T400000085 | MP101000085 | Parvovirus sp. | 085    | MP101000085 | NS   | 085     | 085    |
| Phage T400000086 | MP101000086 | Parvovirus sp. | 086    | MP101000086 | NS   | 086     | 086    |
| Phage T400000087 | MP101000087 | Parvovirus sp. | 087    | MP101000087 | NS   | 087     | 087    |
| Phage T400000088 | MP101000088 | Parvovirus sp. | 088    | MP101000088 | NS   | 088     | 088    |
| Phage T400000089 | MP101000089 | Parvovirus sp. | 089    | MP101000089 | NS   | 089     | 089    |
| Phage T400000090 | MP101000090 | Parvovirus sp. | 090    | MP101000090 | NS   | 090     | 090    |
| Phage T400000091 | MP101000091 | Parvovirus sp. | 091    | MP101000091 | NS   | 091     | 091    |
| Phage T400000092 | MP101000092 | Parvovirus sp. | 092    | MP101000092 | NS   | 092     | 092    |
| Phage T400000093 | MP101000093 | Parvovirus sp. | 093    | MP101000093 | NS   | 093     | 093    |
| Phage T400000094 | MP101000094 | Parvovirus sp. | 094    | MP101000094 | NS   | 094     | 094    |
| Phage T400000095 | MP101000095 | Parvovirus sp. | 095    | MP101000095 | NS   | 095     | 095    |
| Phage T400000096 | MP101000096 | Parvovirus sp. | 096    | MP101000096 | NS   | 096     | 096    |
| Phage T400000097 | MP101000097 | Parvovirus sp. | 097    | MP101000097 | NS   | 097     | 097    |
| Phage T400000098 | MP101000098 | Parvovirus sp. | 098    | MP101000098 | NS   | 098     | 098    |
| Phage T400000099 | MP101000099 | Parvovirus sp. | 099    | MP101000099 | NS   | 099     | 099    |
| Phage T400000100 | MP101000100 | Parvovirus sp. | 100    | MP101000100 | NS   | 100     | 100    |
